1

# 2 Synteny-based analyses indicate that sequence divergence is 3 not the main source of orphan genes

4

5

6 **Authors:** Nikolaos Vakirlis<sup>1</sup>, Anne-Ruxandra Carvunis<sup>2\*</sup> and Aoife McLysaght<sup>1\*</sup>

## 7 **Affiliations:**

8 <sup>1</sup>Smurfit Institute of Genetics, Trinity College Dublin, University of Dublin, Dublin 2, Ireland.

9 <sup>2</sup>Department of Computational and Systems Biology, Pittsburgh Center for Evolutionary Biology  
10 and Medicine, School of Medicine, University of Pittsburgh, Pittsburgh, PA 15213, United States.

11 \*Correspondence to: [aoife.mclysaght@tcd.ie](mailto:aoife.mclysaght@tcd.ie), [anc201@pitt.edu](mailto:anc201@pitt.edu).

12

13

## 14 **Abstract**

15 The origin of “orphan” genes, species-specific sequences that lack detectable homologues, has  
16 remained mysterious since the dawn of the genomic era. There are two dominant explanations  
17 for orphan genes: complete sequence divergence from ancestral genes, such that homologues  
18 are not readily detectable; and *de novo* emergence from ancestral non-genic sequences, such  
19 that homologues genuinely do not exist. The relative contribution of the two processes remains  
20 unknown. Here, we harness the special circumstance of conserved synteny to estimate the

21 contribution of complete divergence to the pool of orphan genes. By separately comparing yeast,  
22 fly and human genes to related taxa using conservative criteria, we find that complete divergence  
23 accounts, on average, for at most a third of eukaryotic orphan and taxonomically restricted  
24 genes. We observe that complete divergence occurs at a stable rate within a phylum but at  
25 different rates between phyla, and is frequently associated with gene shortening akin to  
26 pseudogenization. Two cancer-related human genes, *DEC1* and *DIRC1*, have likely originated via  
27 this route in a primate ancestor.

28

## 29 Background

30 Extant genomes contain a large repertoire of protein-coding genes which can be grouped into  
31 families based on sequence similarity. Comparative genomics has heavily relied on grouping  
32 genes and proteins in this manner since the dawn of the genomic era<sup>1</sup>. Within the limitations of  
33 available similarity-detection methods, we thus define thousands of distinct gene families. Given  
34 that the genome and gene repertoire of the Last Universal Common Ancestor (LUCA) was likely  
35 small relative to that of most extant eukaryotic organisms<sup>2,3</sup> (Figure 1A), what processes gave rise  
36 to these distinct gene families? Answering this question is essential to understanding the  
37 structure of the gene/protein universe, its spectrum of possible functions, and the evolutionary  
38 forces that ultimately gave rise to the enormous diversity of life on earth.

39

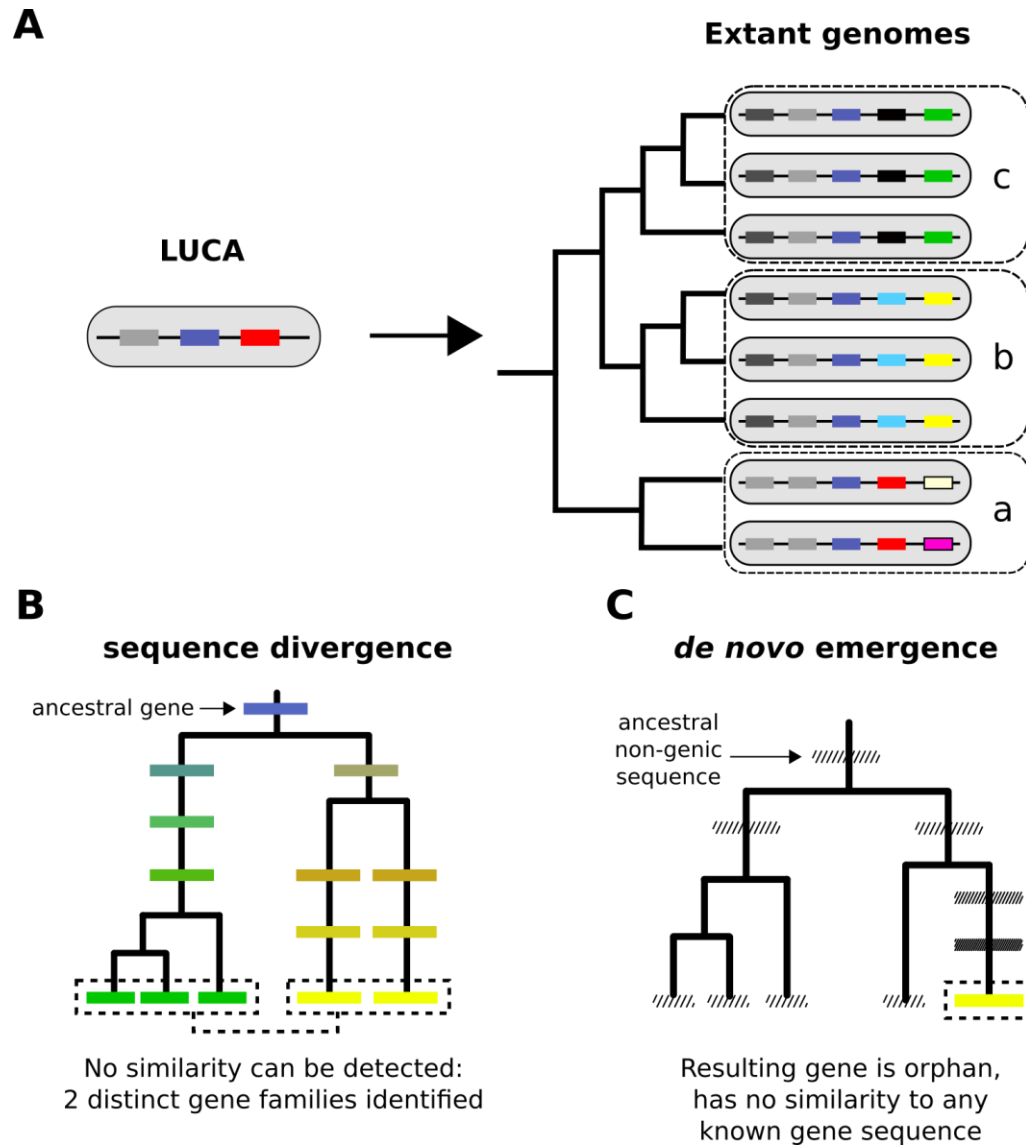

40

41 **Figure 1: From a limited set of genes in LUCA to the multitudinous extant patterns of presence**  
 42 **and absence of genes.**

43 A. Cartoon representation of the LUCA gene repertoire and extant phylogenetic distribution  
 44 of gene families (shown in different colours, same colour represents sequence similarity  
 45 and homology). Dashed boxes denote different phylogenetic species groups. Light grey  
 46 and dark blue gene families cover all genomes and can thus be traced back to the common  
 47 ancestor. Other genes may have more restricted distributions; for example, the yellow  
 48 gene is only found in group b, the black gene in group c. The phylogenetic distribution of  
 49 gene family members allows us to propose hypotheses about the timing of origination of  
 50 each family.

51 B. Sequence divergence can gradually erase all similarity between homologous sequences,  
 52 eventually leading to their identification as distinct gene families. Note that divergence

53 can also occur after a homologous gene was acquired by horizontal transfer. Solid boxes  
54 represent genes. Sequence divergence is symbolized by divergence in colour.

55 C. *De novo* emergence of a gene from a previously non-genic sequence along a specific  
56 lineage will almost always result to a unique sequence in that lineage (cases of convergent  
57 evolution can in theory occur). Hashed boxes represent non-genic sequences.

58

59 To some extent, the distinction between gene families is operational and stems from our  
60 imperfect similarity-detection ability. But to a larger extent it is biologically meaningful because  
61 it captures shared evolutionary histories and, by extension, shared properties between genes  
62 that are useful to know<sup>4,5</sup>. Genes that cannot be assigned to any known gene family have  
63 historically been termed “orphan”. This term can be generalized to Taxonomically Restricted  
64 Gene (TRG), which includes genes that belong to small families found only across a closely related  
65 group of species and nowhere else<sup>6</sup>.

66 By definition, orphan genes and TRGs can be the result of two processes. The first process  
67 is divergence of pre-existing genes<sup>7</sup>. Given enough time, a pair of genes that share a common  
68 ancestor (homologous genes) can reach the “twilight zone”<sup>8</sup>, a point at which similarity is no  
69 longer detectable. From a sequence-centric standpoint, we can consider such entities as bearing  
70 no more similarity than expected by chance. They are the seeds of two new gene families (Figure  
71 1B). An example of this was found when examining yeast duplicates resulting from whole genome  
72 duplication (WGD) where it was reported that about 5% of the ~500 identified paralogue pairs  
73 had very weak or no similarity at all<sup>9</sup>. Divergence of pre-existing genes can occur during vertical  
74 descent (Figure 1B), as well as following horizontal transfer of genetic material between different  
75 species<sup>10</sup>. The second process is *de novo* emergence from previously non-genic sequences<sup>11–13</sup>  
76 (Figure 1C). For a long time, divergence was considered to be the only realistic evolutionary

77 explanation for the origin of new gene families<sup>14</sup>, while *de novo* emergence has only recently  
78 been appreciated as a widespread phenomenon<sup>13,15–17</sup>. *De novo* emergence is thought to have a  
79 high potential to produce entirely unique genes<sup>18</sup> (though examples of convergent selection exist,  
80 see<sup>19,20</sup>), whereas divergence, being more gradual, can stop before this occurs. What is the  
81 relative contribution of these two mechanisms to the “mystery of orphan genes”<sup>21</sup>?

82         We set out to study the process of complete divergence of genes by delving into the  
83 “unseen world of homologs”<sup>9</sup>. More specifically, we sought to understand how frequently  
84 homologues diverge beyond recognition, reveal how the process unfolds, and explicitly identify  
85 resulting TRGs. To do so, we developed a novel synteny-based approach for homology detection  
86 and applied it to three lineages. Our approach allowed us to trace the limits of similarity searches  
87 in the context of homologue detection. We show that genes which diverge beyond these limits  
88 exist, that they are being generated at a steady rate during evolution, and that they account, on  
89 average, for at most a third of all genes without detectable homologues. All but a small  
90 percentage of these undetectable homologues lack similarity at the protein domain level. Finally,  
91 we study specific examples of novel genes that have originated or are on the verge of originating  
92 from pre-existing ones, revealing a possible role of gene disruption and truncation in this process.  
93 We show that in the human lineage, this evolutionary route has given rise to at least two primate-  
94 specific, cancer-related genes.

95

## 96 Results

97

### 98 A synteny based approach to establish homology beyond sequence similarity

99 To estimate the frequency at which homologues diverge beyond recognition, we developed a  
100 pipeline that allows the identification of candidate homologous genes regardless of whether  
101 pairwise sequence similarity can be detected. The central idea behind our pipeline is that genes  
102 found in conserved syntenic positions in a pair of genomes will usually share ancestry. The same  
103 basic principle has been previously used to detect pairs of WGD paralogues in yeast<sup>22-24</sup> and  
104 more recently to identify homologous long non-coding RNAs<sup>25</sup>. Coupled with the knowledge that  
105 biological sequences diverge over time, this allows us to estimate how often a pair of homologous  
106 genes will diverge beyond detectable sequence similarity in the context of syntenic regions. This  
107 estimate can then be extrapolated genome-wide to approximate the extent of origin by complete  
108 divergence for orphan genes and TRGs outside of syntenic regions, provided that genes outside  
109 regions of conserved synteny have similar evolutionary rates as genes inside syntenic regions.  
110 The estimates that we will provide of the rate of divergence beyond recognition inside synteny  
111 blocks are best viewed as an upper-bound of the true rate because some of the genes found in  
112 conserved syntenic positions in a pair of genomes will not be homologous. If we could remove all  
113 such cases, the rate of divergence beyond recognition would only decrease, but not increase,  
114 relative to our estimate (Figure 2A).

115 Figure 2B illustrates the main steps of the pipeline and the full details can be found in  
116 Methods. Briefly, we first select a set of target genomes to compare to our focal genome (Figure

117 2B, step 1). Using precomputed pairs of homologous genes (those belonging to the same  
118 OrthoDB<sup>26</sup> group) we identify regions of conserved micro-synteny. Our operational definition of  
119 conserved micro-synteny consists of cases where a gene in the focal genome is found within a  
120 conserved chromosomal block of at least four genes, that is two immediate downstream and  
121 upstream neighbours of the focal gene have homologues in the target genome that are  
122 themselves separated by one or two genes (Figure 2B, step 2). All focal genes for which at least  
123 one region of conserved micro-synteny, in any target genome, is identified, are retained for  
124 further analysis. This step establishes a list of focal genes with at least one presumed homologue  
125 in one or more target genomes (i.e., the gene located in the conserved location in the micro-  
126 synteny block).

127 We then examine whether the focal gene has any sequence similarity in the target  
128 species. We search for sequence similarity in two ways: comparison with annotated genes  
129 (proteome), and comparison with the genomic DNA (genome). First, we search within BLASTP  
130 matches that we have precomputed ourselves (these are different from the OrthoDB data) using  
131 the complete proteome of the focal species as query against the complete proteome of the target  
132 species. Within this BLASTP output we look for matches between the query gene and the  
133 candidate gene (that is, between  $b$  and  $b'$ , Figure 2B, step 3). If none is found then we use  
134 TBLASTN to search the genomic region around the candidate gene  $b'$  for similarity to the query  
135 gene  $b$  (Figure 2B, step 4, see figure legend for details). If no similarity is found, the search is  
136 extended to the rest of the target proteome and genome (Figure 2B, step 5). If there is no  
137 sequence similarity after these successive searches, then we infer that the sequence has diverged  
138 beyond recognition. After having recorded whether similarity can be detected for all eligible

139 query genes, we finally retrieve the focal-target pairs and produce the found-not found  
140 proportions for each pair of genomes.

141 We applied this pipeline to three independent datasets using as focal species  
142 *Saccharomyces cerevisiae* (yeast), *Drosophila melanogaster* (fly) and *Homo sapiens* (human). We  
143 included 17, 16 and 15 target species, respectively, selected to represent a wide range of  
144 evolutionary distances from each focal species (see Methods). The numbers of cases of  
145 conserved micro-synteny detected for each focal-target genome pair is shown in Figure 2 – figure  
146 supplement 1.

147

148



149

**A**

Two genes (yellow and green) are found **in conserved synteny**, "opposite" each other.

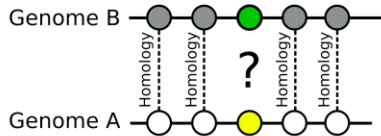

**In most cases** the yellow and green genes will be **homologous**.

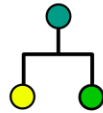

We calculate the number of these cases in which sequence similarity **cannot be detected** between them.

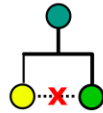

This proportion can be viewed as an **upper bound** estimate because it includes cases where non-homologous genes with dissimilar sequences are found in conserved synteny

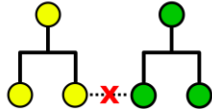

Finally, this **proportion**, calculated over genes in conserved synteny, can be approximately **extrapolated to all genes** if the **distribution of evolutionary rates** of genes that are in conserved synteny is similar to those that are not.

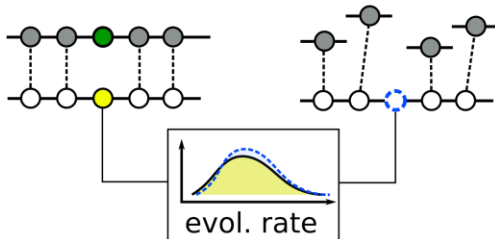

**B**

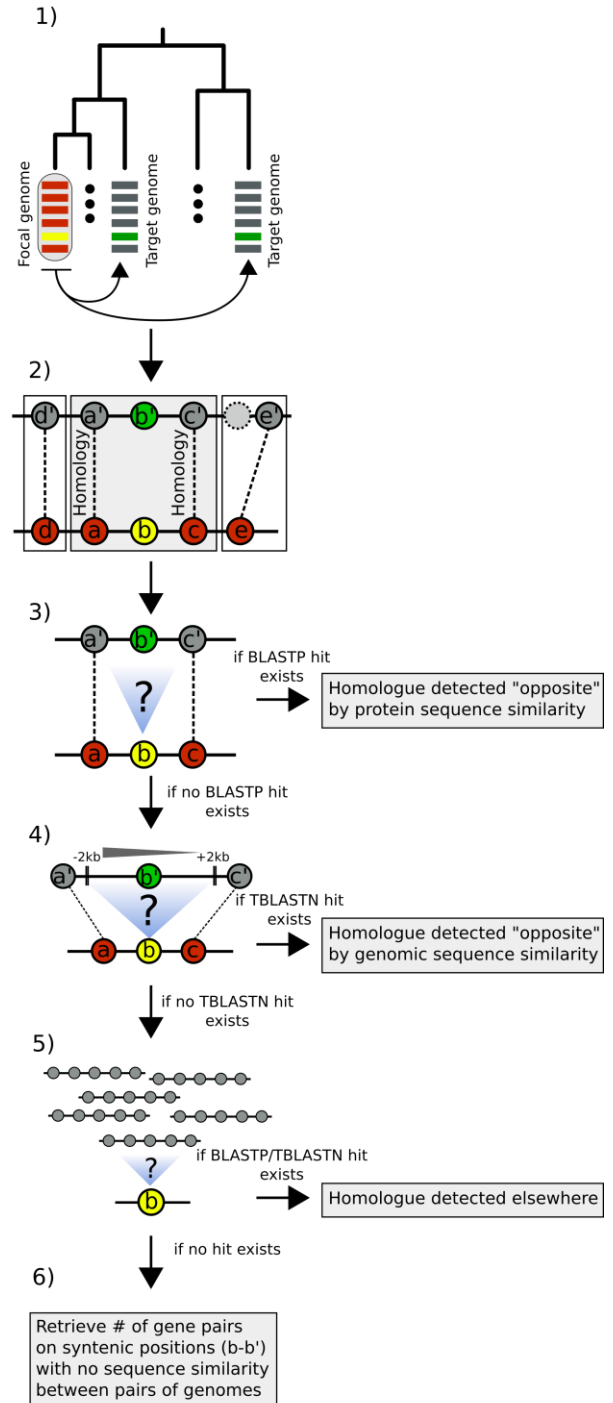

150

151

152 **Figure 2: Summary of the main concept and pipeline of identification of putative homologous**  
 153 **pairs with undetectable similarity between pairs of genomes**

- 154 A. Summary of the reasoning we use to estimate the proportion of genes in a genome that  
155 have diverged beyond recognition.
- 156 B. Pipeline of identification of putative homologous pairs with undetectable similarity.
- 157 1) Choose focal and target species. Parse gene order and retrieve homologous  
158 relationships from OrthoDB for each focal-target pair. Search for sequence similarity  
159 by BLASTP between focal and target proteomes, one target proteome at a time.
- 160 2) For every focal gene ( $b$ ), identify whether a region of conserved micro-synteny exists,  
161 that is when the upstream ( $a$ ) and downstream ( $c$ ) neighbours have homologues ( $a'$ ,  
162  $c'$ ) separated by either one or two genes. This conserved micro-synteny allows us to  
163 assume that  $b$  and  $b'$  are most likely homologues. Only cases for which the conserved  
164 micro-synteny region can be expanded by one additional gene are retained.  
165 Specifically, genes  $d$  and  $e$  must have homologues that are separated by at most 1  
166 gene from  $a'$  and  $c'$ , respectively. A per-species histogram of the number of genes  
167 with at least one identified region of conserved micro-synteny can be found in Figure  
168 2 – figure supplement 1. For all genes where at least one such configuration is found,  
169 move to the next step.
- 170 3) Check whether a precalculated BLASTP hit exists (by our proteome searches) between  
171 query ( $b$ ) and candidate homologue ( $b'$ ) for a given E-value threshold. If no hit exists,  
172 move to the next step.
- 173 4) Use TBLASTN to search for similarity between the query ( $b$ ) and the genomic region  
174 of the conserved micro-synteny ( $-/+$  2kb around the candidate homologue gene) for  
175 a given E-value threshold. If no hit exists, move to the next step.
- 176 5) Extend the search to the entire proteome and genome. If no hit exists, move to the  
177 next step.
- 178 6) Record all relevant information about the pairs of sequences forming the  $b - b'$  pairs  
179 of step 2). Any statistically significant hit at steps 3-5 is counted as detected homology  
180 by sequence similarity. In the end, we count the total numbers of genes in conserved  
181 micro-synteny without any similarity for each pair of genomes.

182

183

#### 184 [Selecting optimal BLAST E-value cut-offs](#)

185 Homology detection is highly sensitive to the technical choices made during sequence similarity  
186 searches<sup>7,27</sup>. We therefore sought to explore how the choice of E-value threshold would impact  
187 interpretations of divergence beyond similarity. First, we performed BLASTP searches of the focal  
188 species' total protein sequences against the total reversed protein sequences of each target

189 species. Matches produced in these searches can safely be considered “false homologies” since  
190 biological sequences do not evolve by reversal<sup>28</sup> (see Methods). These false homologies were  
191 then compared to “undetectable homologies”: cases with conserved micro-synteny (presumed  
192 homologues) but without any detectable sequence similarity.

193 In Figure 3A, we can see how the ratios of undetectable and false homologies vary as a  
194 function of the BLAST E-value threshold used. The proportion of undetectable homologies  
195 depended quasi-linearly on the E-value cut-off. By contrast, false homologies depended  
196 exponentially on the cut-off, as expected from the E-value definition. Furthermore, the impact of  
197 E-value cut-off was more pronounced in comparisons of species separated by longer evolutionary  
198 distances, whereas it was almost non-existent for comparisons amongst the most closely related  
199 species. Conversely, there seems to be no dependence between percentage of false homologies  
200 and evolutionary time across the range of E-values that we have tested (all lines overlap in the  
201 graphs in the bottom panel of Figure 3A). This means that, when comparing relatively closely  
202 related species, failing to appropriately control for false homologies would have an overall more  
203 severe effect on homology detection than failing to account for false negatives.

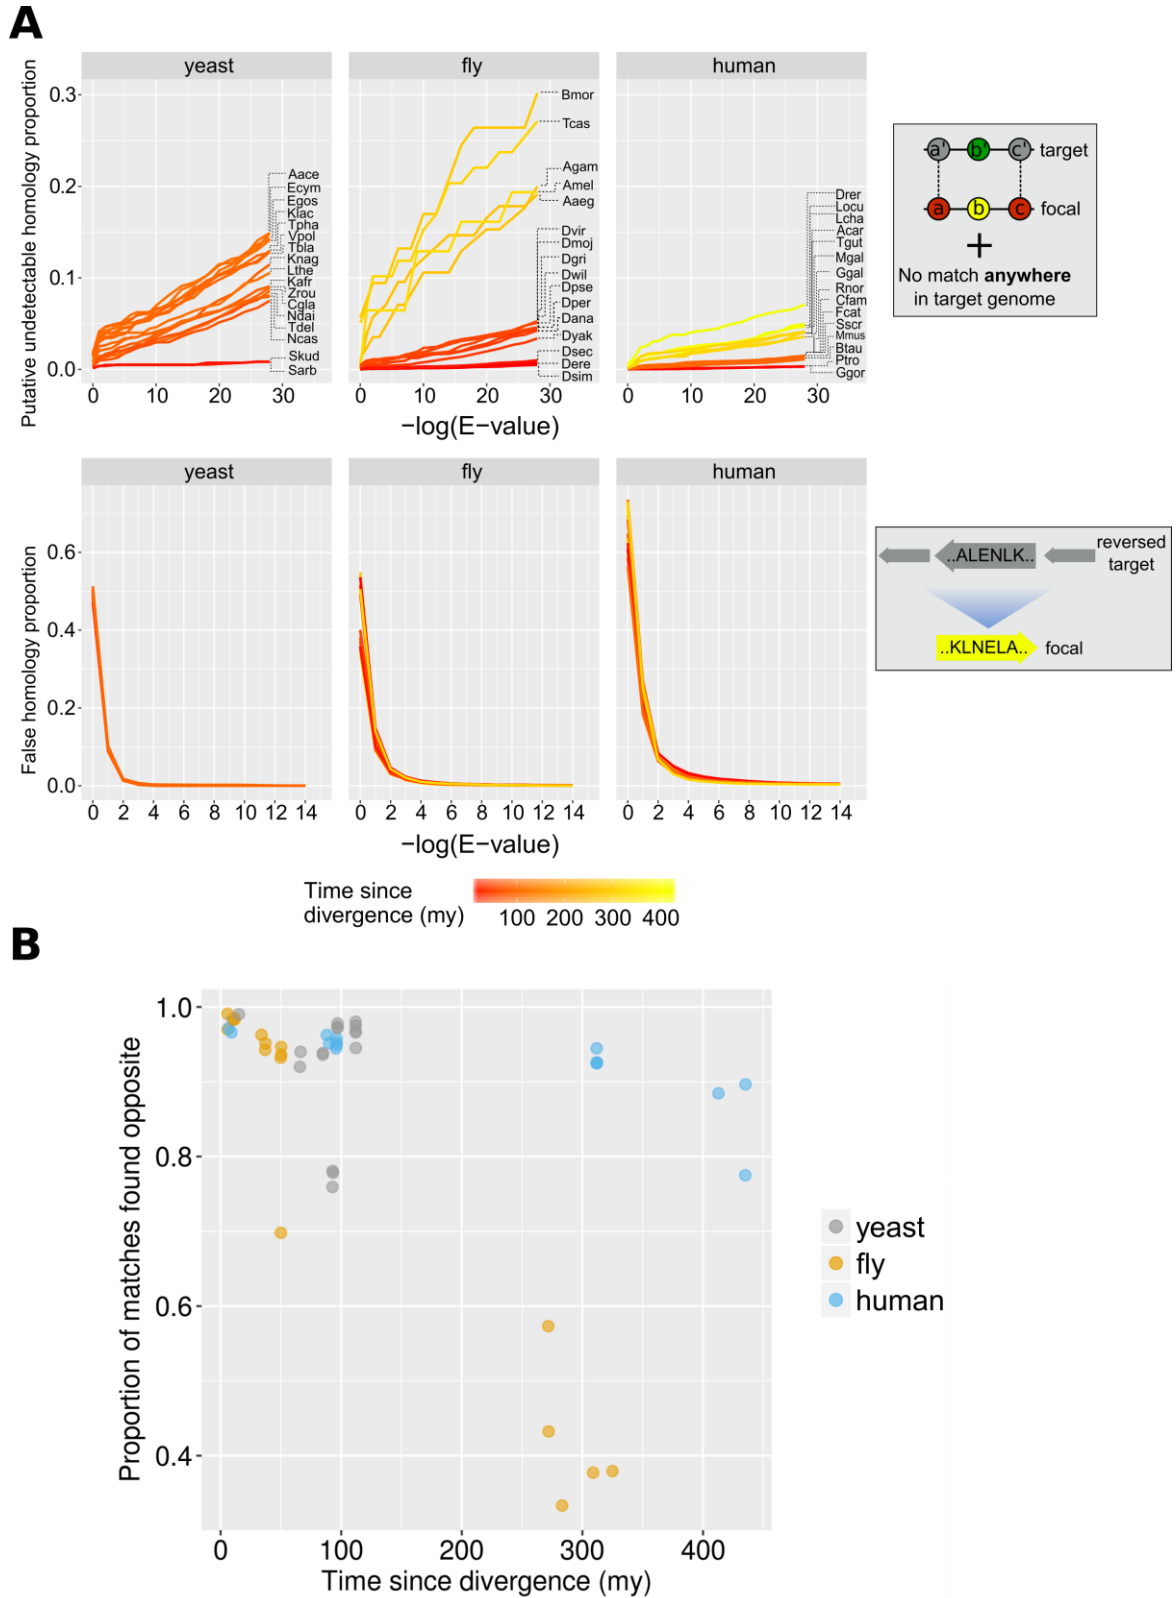

205

206

207 **Figure 3: Proportions of false and undetectable homologies for a range of E-value cut-offs.**

- 208 A. Proportions of false and undetectable homologies as a function of the E-value cut-off  
 209 used. Abbreviations of species names can be found in Table 1. Putative undetectable  
 210 homology proportion (top row) is defined as the percentage of all genes with at least one  
 211 identified region of conserved micro-synteny (and thus likely to have a homologue in the  
 212 target genome) that have no significant match anywhere in the target genome (see  
 213 Methods and Figure 2). False homology proportion (bottom row) is defined as a significant  
 214 match to the reversed proteome of the target species (see Methods). Divergence time  
 215 estimates were obtained from [www.TimeTree.org](http://www.TimeTree.org) . Data for this figure can be found in  
 216 Figure 3 – Source Data 1 (upper plots) and Figure 3 – Source Data 2 (lower plots).  
 217 B. Proportion (out of all genes with sequence matches) where a match is found in the  
 218 predicted region (“opposite”) in the target genome for the three datasets, using the  
 219 relaxed E-value cut-offs (0.01, 0.01, 0.001 for yeast, fly and human respectively [ $10^{-4}$  for  
 220 comparison with chimpanzee]), as a function of time since divergence from the respective  
 221 focal species. Data can be found in Figure 3 – figure supplement 1.

222

| Full name                         | Abbr. | Full name                       | Abbr. | Full name                   | Abbr. |
|-----------------------------------|-------|---------------------------------|-------|-----------------------------|-------|
| <i>Saccharomyces kudriavzevii</i> | Skud  | <i>Drosophila sechellia</i>     | Dsec  | <i>Pan troglodytes</i>      | Ptro  |
| <i>Saccharomyces arboricola</i>   | Sarb  | <i>Drosophila simulans</i>      | Dsim  | <i>Gorilla gorilla</i>      | Ggor  |
| <i>Naumovozya castellii</i>       | Ncas  | <i>Drosophila erecta</i>        | Dere  | <i>Mus musculus</i>         | Mmus  |
| <i>Naumovozya dairenensis</i>     | Ndai  | <i>Drosophila yakuba</i>        | Dyak  | <i>Rattus norvegicus</i>    | Rnor  |
| <i>Kazachstania naganishii</i>    | Knag  | <i>Drosophila ananassae</i>     | Dana  | <i>Bos taurus</i>           | Btau  |
| <i>Kazachstania africana</i>      | Kafr  | <i>Drosophila persimilis</i>    | Dper  | <i>Canis familiaris</i>     | Cfam  |
| <i>Vanderwaltozyma polyspora</i>  | Vpol  | <i>Drosophila pseudoobscura</i> | Dpse  | <i>Felis catus</i>          | Fcat  |
| <i>Tetrapisispora blattae</i>     | Tbla  | <i>Drosophila mojavensis</i>    | Dmoj  | <i>Sus scrofa</i>           | Sscr  |
| <i>Tetrapisispora phaffii</i>     | Tpha  | <i>Drosophila willistoni</i>    | Dwil  | <i>Anolis carolinensis</i>  | Acar  |
| <i>Torulaspota delbrueckii</i>    | Tdel  | <i>Drosophila grimshawi</i>     | Dgri  | <i>Gallus gallus</i>        | Ggal  |
| <i>Candida glabrata</i>           | Cgla  | <i>Drosophila virilis</i>       | Dvir  | <i>Meleagris gallopavo</i>  | Mgal  |
| <i>Zygosaccharomyces rouxii</i>   | Zrou  | <i>Anopheles gambiae</i>        | Agam  | <i>Taeniopygia guttata</i>  | Tgut  |
| <i>Kluyveromyces lactis</i>       | Klac  | <i>Aedes aegypti</i>            | Aaeg  | <i>Latimeria chalumnae</i>  | Lcha  |
| <i>Lachancea thermotolerans</i>   | Lthe  | <i>Bombyx mori</i>              | Bmor  | <i>Danio rerio</i>          | Drer  |
| <i>Eremothecium cymbalariae</i>   | Ecym  | <i>Tribolium castaneum</i>      | Tcas  | <i>Lepisosteus oculatus</i> | Locu  |
| <i>Ashbya aceri</i>               | Aace  | <i>Apis mellifera</i>           | Amel  |                             |       |
| <i>Eremothecium gossypii</i>      | Egos  |                                 |       |                             |       |

223

224 **Table 1: Names and abbreviations of target species included in the three datasets.**

225  
226           In the context of phylostratigraphy (estimation of phylogenetic branch of origin of a gene  
227 based on its taxonomic distribution<sup>29</sup>), gene age underestimation due to BLAST “false negatives”  
228 has been considered a serious issue<sup>30</sup>, although the importance of spurious BLAST hits generating  
229 false positives has also been stressed<sup>31</sup>. We defined a set of E-value cut-offs optimised for  
230 phylostratigraphy, by choosing the highest E-value that keeps false homologies under 5%. This  
231 strategy emphasizes sensitivity over specificity. We have also calculated general-use optimal E-  
232 values by using a balanced binary classification measure (see Methods). The phylostratigraphy  
233 optimal E-value thresholds are 0.01 for all comparisons using yeast and fly as focal species and  
234 0.001 for those of human, except for chimpanzee ( $10^{-4}$ ). These are close to previously estimated  
235 optimal E-value cut-offs for identifying orphan genes in *Drosophila*, found in the range of  $10^{-3}$  -  
236  $10^{-5}$ , see ref<sup>32</sup>. These cut-offs have been used for all downstream analyses.

237           We find that, for the vast majority of focal genes examined that do have matches, the  
238 match occurs in the predicted region (“opposite”), i.e., within the region of conserved micro-  
239 synteny. In 36/48 pair-wise species comparisons, at least 90% of the focal genes in micro-synteny  
240 for which at least one match was eventually found in the target genome, a match was within the  
241 predicted micro-syntenic region (Figure 3B). This finding supports the soundness of our synteny-  
242 based approach for homologue identification.

243           In total, we were able to identify 180, 83 and 156 unique focal species genes in the dataset  
244 of yeast, fly and human respectively, that have at least one undetectable homologue in at least  
245 one target species but no significant sequence similarity to that homologue or to any other part  
246 of the target genome (see Figure 4 – figure supplement 1 for two exemplars of these findings).

247

248

249 The rate of “divergence beyond recognition” and its contribution to the  
250 total pool of genes without similarity

251 How quickly do homologous genes become undetectable? In other words, given a pair of  
252 genomes from species separated by a certain amount of evolutionary time, what percentage of  
253 their genes will have diverged beyond recognition? Within phyla, the proportion of putative  
254 undetectable homologues correlated strongly with time since divergence, suggesting a  
255 continuous process acting during evolution (Figure 4). However, different rates were observed  
256 between phyla, represented by the slopes of the fitted linear models in Figure 4. Genes appeared  
257 to be diverging beyond recognition at a faster pace in the yeast and fly lineages than in the human  
258 lineage.

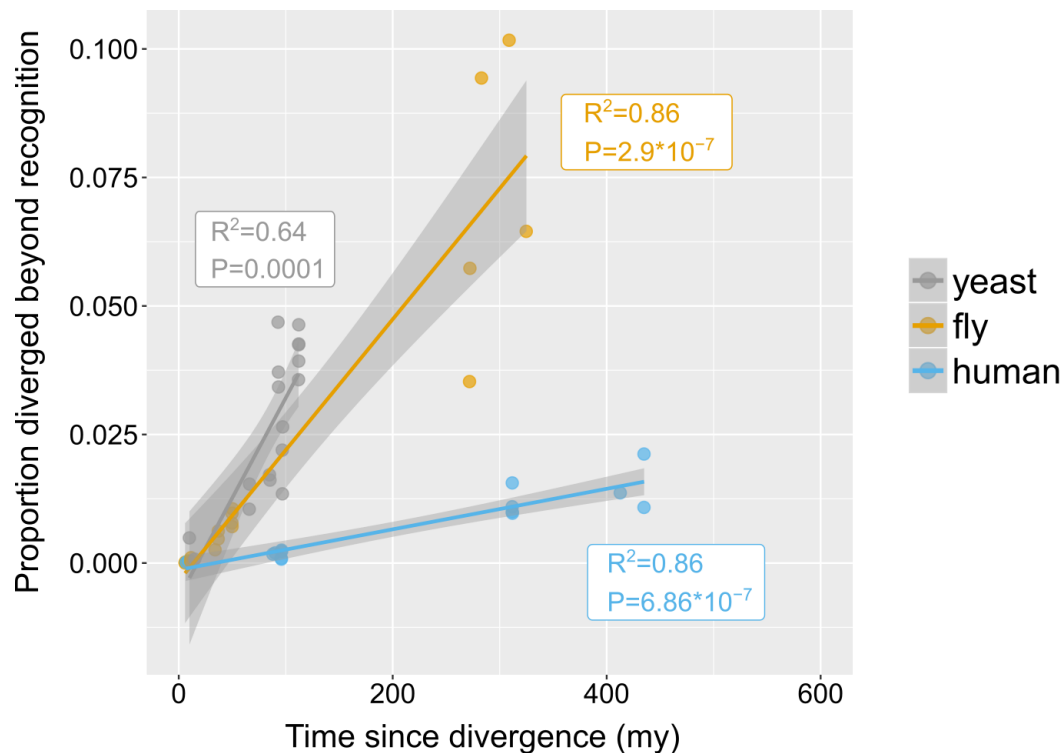

259

#### 260 **Figure 4: Rates of divergence beyond recognition**

261 Putative undetectable homology proportion in focal - target species pairs plotted against time  
262 since divergence of species. The y axis represents the proportion of focal genes in micro-synteny  
263 regions for which a homologue cannot be detected by similarity searches in the target species.  
264 Linear fit significance is shown in the graph. Points have been jittered along the X axis for visibility.  
265 Two exemplars of focal-target undetectable homologues can be found in Figure 4 – figure  
266 supplement 1. Data can be found in Figure 3 – figure supplement 1.

267

268 We next sought to estimate how much the process of divergence beyond recognition  
269 contributes to the genome-wide pool of genes without detectable similarity. To do so, we need  
270 to assume that the proportion of genes that have diverged beyond recognition in micro-synteny  
271 blocks (Figure 4) can be used as a proxy for the genome-wide rate of origin-by-divergence for  
272 genes without detectable similarity, irrespective of the presence of micro-synteny conservation.  
273 This in turn depends on the distribution of evolutionary rates inside and outside micro-synteny  
274 blocks.



275           We calculated the non-synonymous ( $d_N$ ) and synonymous ( $d_S$ ) substitution rates of genes  
276 found inside and outside regions of conserved micro-synteny relative to closely related species  
277 (Methods). Figure 5A shows density plots of the distributions. The distributions of  $d_S$  are  
278 statistically indistinguishable for genes inside and outside of micro-synteny regions in the yeast  
279 and fly datasets. The distributions of  $d_N$  for all three datasets and  $d_S$  for the human dataset show  
280 a statistically significant increase in genes outside conserved micro-synteny regions compared to  
281 genes inside such regions, but the effect size is minimal, almost negligible (Rosenthal's  $R \sim 0.05$ ,  
282 Figure 5B). It is impossible to directly compare the evolutionary rates of genes lacking  
283 homologues inside and outside conserved micro-synteny. However, such genes only account for  
284 a miniscule percentage of all genes in the genome: 0.0013, 0.008 and 0.029 in fly, human and  
285 yeast respectively. Despite these minimal caveats, evolutionary rates are globally very similar  
286 inside and outside regions of conserved micro-synteny, allowing to extrapolate with confidence.

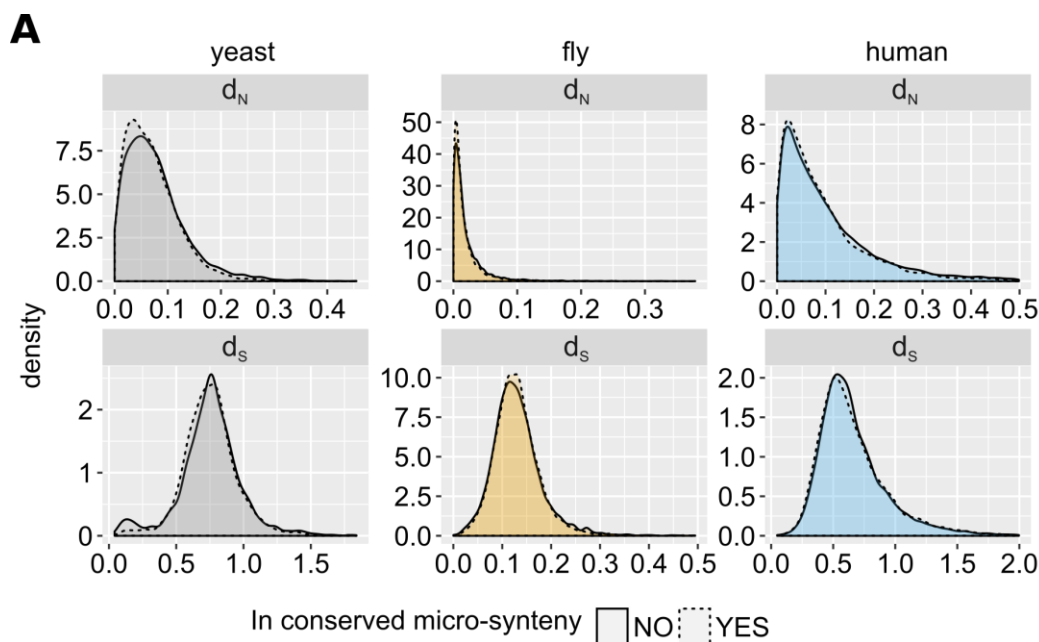

**B**

| dataset | $d_N$ P-value | $d_S$ P-value | $d_N$ Effect Size | $d_S$ Effect Size | N     |
|---------|---------------|---------------|-------------------|-------------------|-------|
| yeast   | 8.50E-005     | 0.14          | 0.054             | 0.02              | 5194  |
| fly     | 6.60E-009     | 0.92          | 0.056             | 0.00089           | 10681 |
| human   | 1.69E-010     | 0.011         | 0.048             | 0.019             | 17252 |

287

288 **Figure 5: Comparison of evolutionary rates between genes inside and outside conserved micro-**  
 289 **synteny regions.**

290 A. Density plots of  $d_S$  and  $d_N$  distributions. Outliers are not shown for visual purposes Data  
 291 can be found in Figure 5 – Source Data 1.

292 B. Statistics of unpaired Wilcoxon test comparisons between genes inside and outside of  
 293 conserved micro-synteny. Effect size was calculated using Rosenthal's formula<sup>33</sup>  
 294 ( $Z/\sqrt{N}$ ).

295

296 We extrapolated the proportion of genes without detectable similarity that have  
 297 originated by complete divergence, as calculated from conserved micro-synteny blocks (Figure  
 298 4), to all genes without similarity in the genome (Figure 6, see Methods and Figure 6 – figure  
 299 supplement 1 for detailed description). We found that, in most pairwise species comparisons,  
 300 the observed proportion of all genes without similarity far exceeds that estimated to have

301 originated by divergence (Figure 6A). The estimated contribution of divergence ranges from 0%  
302 in the case of *D. sechellia* (fly dataset), to 57% in the case of *T. castaneum* (fly dataset), with an  
303 overall average of 20.5% (Figure 6B).

304 We also applied the same reasoning to estimate how much divergence beyond  
305 recognition contributes to TRGs. To this aim we calculated the fraction of focal genes lacking  
306 detectable homologues in a phylogeny-based manner, in the target species and in all species  
307 more distantly related to the focal species than the target species (see Methods and Figure 6 -  
308 figure supplement 2A for a schematic explanation). Again, the observed proportion of TRGs far  
309 exceeded that estimated to have originated by divergence (the contribution of divergence  
310 ranging from 0% to 52% corresponding to the first and before-last “phylostratum” of the fly  
311 dataset tree respectively, with an overall average of 30%; Figure 6 – figure supplement 2B and  
312 C). We estimate that the proportion of TRGs which originated by divergence-beyond-recognition,  
313 at the level of *Saccharomyces*, *melanogaster* subgroup, and primates are at most 45%, 20% and  
314 24% respectively (Methods). Thus, we conclude that the origin of most genes without similarity  
315 cannot be attributed to divergence beyond recognition. This implies a substantial role for other  
316 evolutionary mechanisms such as *de novo* emergence and horizontal gene transfer.

317

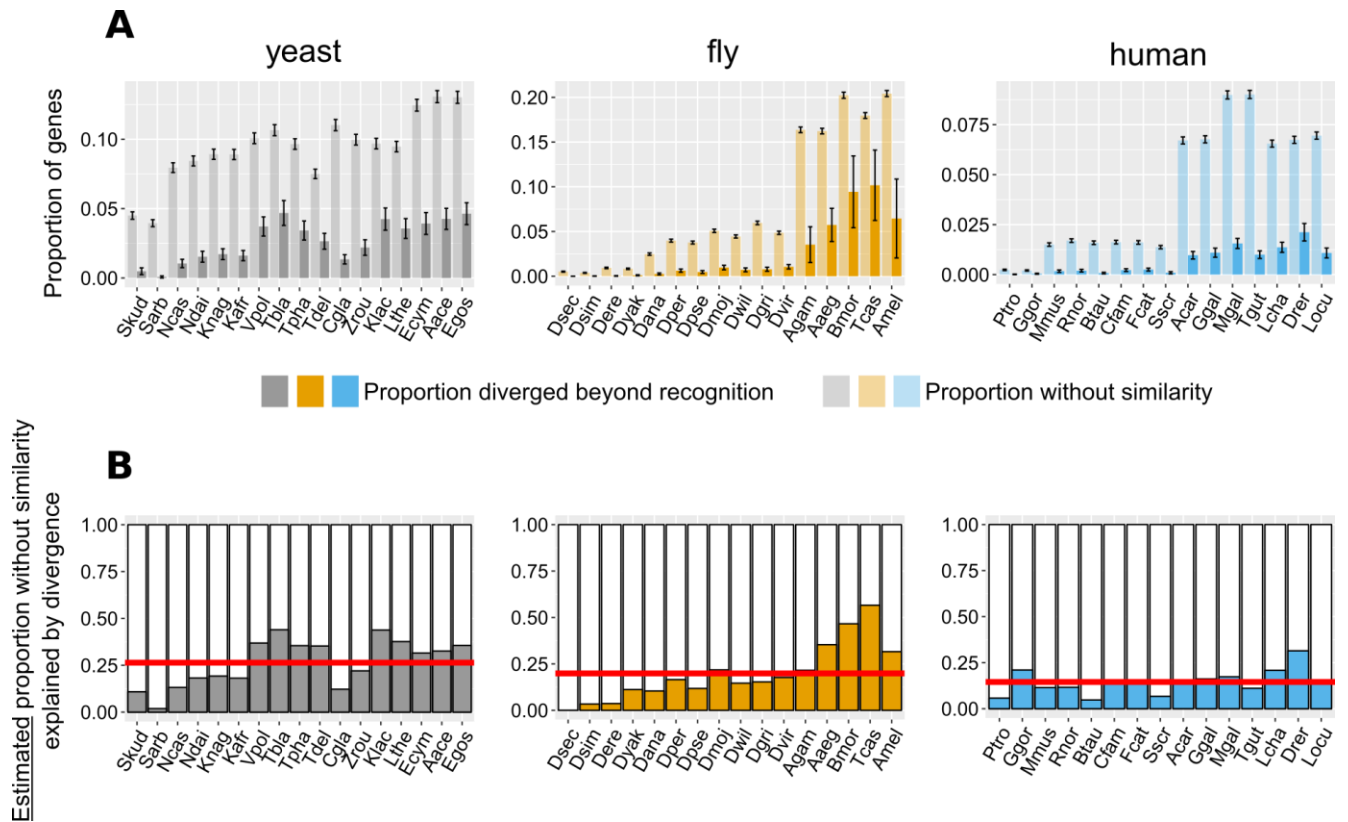

318

319 **Figure 6: Contribution of divergence beyond recognition to observed numbers of genes without**  
 320 **detectable similarity.**

321 A. : Proportion of genes with undetectable homologues in micro-synteny regions (thus likely  
 322 diverged beyond recognition, solid bars) and proportion of total genes without similarity,  
 323 genome-wide (transparent bars), in the different focal - target genome pairs. Schematic  
 324 representation for how these proportions are calculated can be found in Figure 6 – figure  
 325 supplement 1. Error bars show the standard error of the proportion.

326 B. Estimated proportions of genes with putative undetectable homologues (explained by  
 327 divergence) out of the total number of genes without similarity genome-wide. This  
 328 proportion corresponds to the ratio of the micro-synteny proportion (solid bars in top  
 329 panel) extrapolated to all genes, to the proportion calculated over all genes (transparent  
 330 bars in top panel). See text for details. Red horizontal lines show averages. Species are  
 331 ordered in ascending time since divergence from the focal species. Abbreviations used  
 332 can be found in Table 1. The equivalent results using the phylogeny-based approach can  
 333 be found in Figure 6 – figure supplement 2. Data for this figure and for Figure 6 – figure  
 334 supplement 2 can be found in Figure 6 – Source Data 1.

335

336

## 337 Properties of genes diverged beyond recognition

338 Even as homologous primary sequences diverge beyond recognition, it is conceivable that other  
339 ancestral similarities persist. We found weak but significant correlations between pairs of  
340 undetectable homologues in the human dataset when comparing G+C content (Spearman's  
341  $\rho=0.25$ ,  $P\text{-value}=2*10^{-5}$ ) and CDS length (Spearman's  $\rho=0.35$ ,  $P\text{-value}=1.5*10^{-9}$ ). We also  
342 compared protein properties between the pairs of genes and found weak conservation for  
343 solvent accessibility, coiled regions and alpha helices only (yeast: % residues in solvent-exposed  
344 regions,  $\rho=0.14$ ,  $P\text{-value}=0.0033$  ; yeast and human: % residues in coiled protein regions,  
345  $\rho=0.19$ ,  $P\text{-value}=7.9*10^{-05}$  and  $\rho=0.14$ ,  $P\text{-value}=0.017$  ; human : % residues in alpha helices,  
346  $\rho=0.2$ ,  $P\text{-value}=0.00056$ ).

347 We searched for shared Pfam<sup>34</sup> domains (protein functional motifs) and found that, in the  
348 yeast and human dataset, focal proteins had significantly fewer Pfam matches than their  
349 undetectable homologues (Figure 7A). Overall, a common Pfam match between undetectable  
350 homologues was found only for 12 pairs out of a total of 847 that we examined (1.4%). We also  
351 identified 13 additional cases of undetectable homologue pairs that, despite not sharing any  
352 pairwise similarity, belonged to the same OrthoDB group. Nonetheless, and despite the small  
353 sample size, genes forming these 25 pairs (corresponding to 17 distinct focal genes) were strongly  
354 correlated across 9 out of 10 features tested (Bonferroni-corrected P-values of  $< 0.05$ ; see Figure  
355 7B and Figure 7 – figure supplement 2). Though rare, such cases of retention of similarity at the  
356 protein domain level, suggest the possibility of conservation of ancestral functional signals in the  
357 absence of sequence similarity.

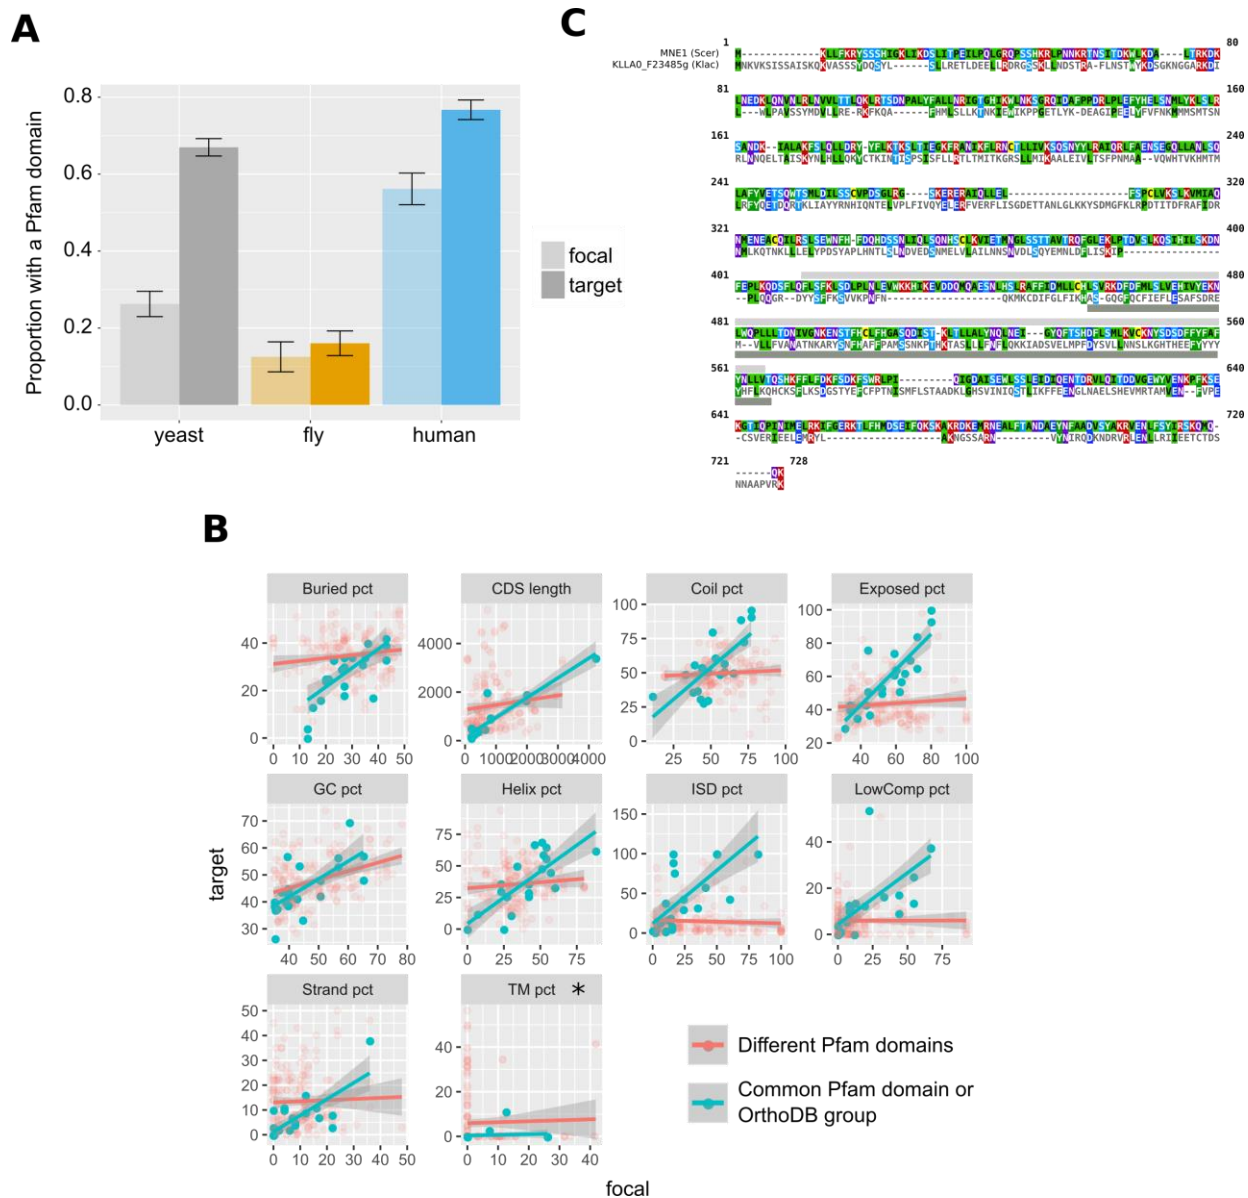

358

359 **Figure 7: Pfam domains and other protein properties across undetectable homologue pairs.**

- 360 A. Pfam domain matches in undetectable homologues. “focal” (transparent bars)  
 361 corresponds to the genes in the focal species, while “target” (solid bars)  
 362 corresponds to their putative undetectable homologues in the target species. Whiskers show the standard error of the  
 363 proportion. The yeast comparison is statistically significant at P-value <  $2.2 \cdot 10^{-16}$  and the  
 364 human comparison at P-value =  $2 \cdot 10^{-5}$  (Pearson’s Chi-squared test). Raw numbers can be  
 365 found in Figure 7 – figure supplement 1.
- 366 B. Distributions of properties of focal genes (“focal”) and their undetectable homologues  
 367 (“target”), when both have a significant match (P-value < 0.001) to a Pfam domain or are  
 368 members of the same OrthoDB group (blue points; n=25), and when they lack a common  
 369 Pfam match but both have at least one (red points; n=184). All blue points correlations

370 are statistically significant (Spearman’s correlation, P-value < 0.05; Bonferroni corrected)  
371 except from percentage of transmembrane residues (TM pct), marked with an asterisk.  
372 Details of correlations can be found in Figure 7 – figure supplement 2. All units are in  
373 percentage of residues, apart from “GC pct” (nucleotide percentage) and CDS length  
374 (nucleotides). “Buried pct”: percentage of residues in regions with low solvent  
375 accessibility; “CDS length”: length of the CDS; “Coil pct”: percentage of residues in coiled  
376 regions; “Exposed pct”: percentage of residues in regions with high solvent accessibility;  
377 “GC pct”: Guanine Cytosine content; “Helix pct”: percentage of residues in alpha helices;  
378 “ISD pct”: percentage of residues in disordered regions; “LowComp pct”: percentage of  
379 residues in low complexity regions; “Strand pct”: percentage of residues in beta strands;  
380 “TM pct”: percentage of residues in transmembrane domains. Data can be found in Figure  
381 7 – Source Data 1.

382 C. Protein sequence alignment generated by MAFFT of *MNE1* and its homologue in *K. lactis*.  
383 Pfam match location is shown with a light grey rectangle in *S. cerevisiae*, and a dark grey  
384 one in *K. lactis*.

385

386 One of these rare cases is *MNE1*, a 1992nt long *S. cerevisiae* gene encoding a protein that  
387 is a component of the mitochondrial splicing apparatus<sup>35</sup>. The surrounding micro-synteny is  
388 conserved in five yeast species, and the distance from the upstream to the downstream  
389 neighbour is well conserved in all five (minimum of 2062nt and a maximum of 2379nt). In four of  
390 the five species the homologue can also be identified by sequence similarity, but *MNE1* of *S.*  
391 *cerevisiae* has no detectable protein or genomic similarity to its homologous gene in  
392 *Kluyveromyces lactis*, KLLA0\_F23485g. Both the conserved micro-synteny and lack of sequence  
393 similarity are confirmed by examination of the Yeast Gene Order Browser<sup>36</sup>. Despite the lack of  
394 primary sequence similarity, the *S. cerevisiae* and *K. lactis* genes share a significant (E-value <  
395 0.001) Pfam match (Pfam accession PF13762.5; Figure 7C) and are members of the same fast-  
396 evolving OrthoDB group (EOG092E0K2I). The two are also not statistically different in terms of  
397 the protein properties that we calculated (Paired t-test P-value=0.8). Thus, *MNE1* exemplifies

398 possible retention of ancestral properties in the absence of detectable pairwise sequence  
399 similarity.

400

## 401 Lineage specific gene origination through divergence

402 We looked for cases of focal genes that resulted from complete lineage-specific divergence along  
403 a specific phylogenetic branch (Figure 8A). When comparing the CDS lengths of these focal genes  
404 to those of their undetectable homologues, we found that focal genes tend to be much shorter  
405 (Figure 8B). This finding could partially explain the shorter lengths frequently associated with  
406 young genes<sup>11,15,37,38</sup>. Through a lineage-specific shift of selection pressure, truncation of the  
407 gene could initiate accelerated divergence in a process that may at first resemble  
408 pseudogenization.

409 We sought a well-defined example to illustrate this process. *YLR255C* is a 354nt long,  
410 uncharacterized yeast ORF that is conserved across *S. cerevisiae* strains according to the  
411 Saccharomyces Genome Database<sup>39</sup> (SGD). *YLR255C* is a species-specific, orphan gene. Our  
412 analyses identified undetectable homologues in four other yeast species. Three of them share  
413 sequence similarity with each other while the fourth one is another orphan gene, specific to *K.*  
414 *naganishii* (Figure 8C). The presence of two orphan genes in conserved synteny is strong evidence  
415 for extensive sequence divergence as an explanation of their origin. Based on the phylogenetic  
416 relationships of the species and the CDS lengths of the undetectable homologues, we can infer  
417 that the ancestor of *YLR255C* was longer (Figure 8C). Furthermore, given that *S. cerevisiae* and *K.*  
418 *naganishii* have both experienced a recent Whole Genome Duplication (WGD), a role of that



419 event in the origination of the two shorter species-specific genes is plausible. The undetectable  
 420 homologue in *T. phaphii*, another post-WGD species, has both similar CDS length to that of the  
 421 pre-WGD ones and conserved sequence similarity to them, which is consistent with a link  
 422 between shortening and loss of sequence similarity.

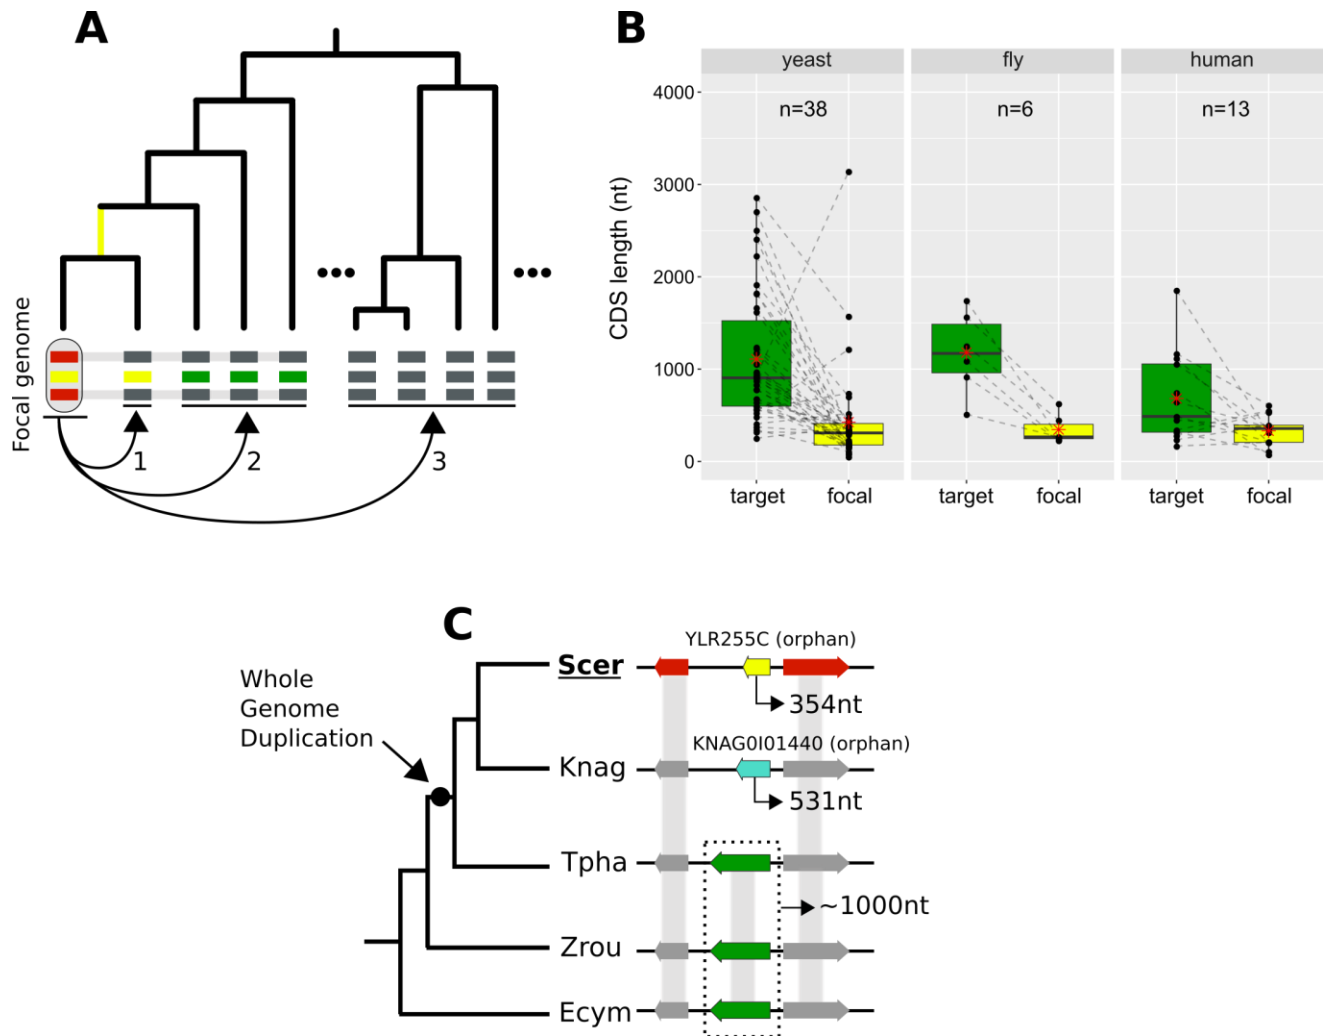

423

424 **Figure 8: Lineage-specific divergence and gene length**

425 A. Schematic representation of the criteria used to detect lineage-specific divergence. 1,  
 426 identification of any lineages where a homologue with a similar sequence can be detected  
 427 (example for one lineage shown). 2, identification of at least 2 non-monophyletic target  
 428 species with an undetectable homologue. 3, search in proteomes of outgroup species to  
 429 ensure that no other detectable homologue exists. The loss of similarity can then be  
 430 parsimoniously inferred as having taken place, through divergence, approximately at the

431 common ancestor of the yellow-coloured genes (yellow branch). Leftmost yellow box:  
432 focal gene; Red boxes: neighbouring genes used to establish conserved micro-synteny;  
433 Green boxes: undetectable homologues. Grey bands connecting genes represent  
434 homology identifiable from sequence similarity.

435 B. CDS length distributions of focal genes and their corresponding undetectable homologues  
436 (averaged across all undetectable homologous genes of each focal one) in the three  
437 datasets. Dashed lines connect the pairs. All comparisons are statistically significant at P-  
438 value<0.05 (Paired Student's t-Test P-values:  $2.5 \times 10^{-5}$ , 0.0037, 0.03 in yeast, fly and  
439 human respectively). Distribution means are shown as red stars. Box colours correspond  
440 to coloured boxes representing genes in A, but only the focal genome gene (leftmost  
441 yellow gene in A) is included in the "focal" category. Data can be found in Figure 8 – figure  
442 supplement 1. All focal-target undetectable homologue pairs (not just the ones included  
443 in this figure) can be found in Figure 8 – Source Data 1.

444 C. Schematic representation of the species topology of 5 yeast species (see Table 1 for  
445 abbreviations) and the genic arrangements at the syntenic region of *YLR255C* (shown at  
446 the "Scer" leaf). Colours of boxes correspond to A. Gene orientations and CDS lengths are  
447 shown. The Whole Genome Duplication branch is tagged with a black dot. Genes grouped  
448 within dotted rectangles share sequence similarity with each other but not with other  
449 genes shown. Grey bands connecting genes represent homology identifiable from  
450 sequence similarity. Green genes: TPHA0B03620, ZYRO0E05390g, Ecym\_2731.

451  
452

453 Finally, we investigated how orphan genes that have originated by divergence beyond  
454 recognition might impact human biology. Our approach isolated thirteen human genes that  
455 underwent complete divergence along the human lineage (see Figure 8 – figure supplement 1).  
456 Examining the ENSEMBL and UniProt resources revealed that three of these thirteen genes are  
457 associated with known phenotypes. One of them is ATP-synthase membrane subunit 8 (*MT-*  
458 *ATP8*), which has been implicated with infantile cardiomyopathy<sup>40</sup> and Kearns-Sayre syndrome<sup>41</sup>  
459 among other diseases. The other two are primate-specific and both associated with cancer:  
460 *DEC1*<sup>42</sup> and *DIRC1*<sup>43</sup>. It is curious that three out of three of these genes are associated with  
461 disease, two of which with cancer, although the small number prevents us from drawing  
462 conclusions. Nonetheless, this observation is consistent with previous findings showing that

463 multiple novel human genes are associated with cancer and cancer outcomes suggesting a role  
464 for antagonistic evolution in the origin of new genes<sup>44</sup>.

465

466

467

468

## 469 Discussion

470

471 The persistent presence of orphans and TRGs in almost every genome studied to date despite  
472 the growing number of available sequence databases demands an explanation. Studies in the  
473 past 20 years have mainly pointed to two mechanisms: *de novo* gene emergence and sequence  
474 divergence of a pre-existing gene, either an ancestrally present or one acquired by horizontal  
475 transfer. However, the relative contributions of these mechanisms have remained elusive until  
476 now. Here, we have specifically addressed this problem and demonstrated that sequence  
477 divergence of ancestral genes explains only a minority of orphans and TRGs.

478 We were very conservative when estimating the proportion of orphans and TRGs that  
479 have evolved by complete divergence inside regions of conserved micro-synteny. Indeed, we  
480 simultaneously underestimated the number of orphans and TRGs while overestimating the  
481 number that originated by divergence. We underestimated the total number of orphans and  
482 TRGs by relying on relaxed similarity search parameters. As a result, we can be confident that  
483 those genes without detectable similarity really are orphans and TRGs, but in turn we also know  
484 that some will have spurious similarity hits giving the illusion that they have homologues when

485 they do not in reality. Furthermore, the annotation that we used in yeast does not include the  
486 vast majority of dubious ORFs, labelled as such because they are not evolutionarily conserved  
487 even though most are supported by experimental evidence<sup>45</sup>.

488         We overestimated the number of genes that have undergone complete divergence by  
489 assuming that all genes in conserved micro-synteny regions share common ancestry. There are  
490 however limitations in using synteny to approximate common descent. First, with time, genome  
491 rearrangements shuffle genes around and synteny is lost. This means that when comparing  
492 distantly related species, the synteny signal will be more tenuous and eventually completely lost.  
493 Second, combinations of evolutionary events can place non-homologous genes in directly  
494 syntenic positions. Indeed, we have detected such a case among our diverged novel gene  
495 candidates in yeast. *BSC4* is one of the first genes for which robust evidence showing *de novo*  
496 emergence could be found<sup>46</sup>, yet this gene meets our criteria for an “undetectable homologue”  
497 because it emerged in a region of conserved synteny to other yeast species and, at the same  
498 time, a species-specific gene duplication in a target species placed an unrelated gene “opposite”  
499 its exact position. Loss of a gene in a lineage followed by tandem duplication of a neighbouring  
500 gene, translocation of a distant one, or *de novo* emergence, could potentially contribute to  
501 placing in syntenic positions pairs of genes that are not in fact homologous. As such, the results  
502 of our pipeline can be viewed as an upper bound estimate of the true rate of divergence beyond  
503 recognition.

504         Previous efforts to measure the rate of complete divergence beyond recognition have  
505 done so using simulations<sup>11,30,47–49</sup>, within a different context and with different goals, mainly to  
506 measure “BLAST error”. Interestingly, our estimates are of the same order of magnitude as

507 previous results from simulations<sup>30,48</sup>. Nonetheless, using the term “BLAST error” or talking about  
508 “false negatives” would be epistemologically incorrect in our case. When focusing on the  
509 outcome of divergence itself, it is clear that once all sequence similarity has been erased by  
510 divergence, BLAST, a *similarity* search tool, should not be expected to detect any.

511         Simulation-based studies have been valuable in quantifying the link between evolutionary  
512 distance and absence of sequence similarity. They are however limited in that they can only show  
513 that sequence divergence *could* explain a certain proportion of orphans and TRGs, not that it  
514 actually *does* explain it. Making the jump from “could” to “does” requires the assumption that  
515 divergence beyond recognition is much more plausible than, for example, *de novo* emergence.  
516 This is a prior probability which, currently, is at best uncertain. Our approach, on the other hand,  
517 does not make assumptions with respect to the evolutionary mechanisms at play, that is we do  
518 not need prior knowledge of the prevalence of divergence beyond recognition to obtain an  
519 estimate.

520         Many studies have previously reported that genes without detectable homologues  
521 tended to be shorter than conserved ones<sup>7,50–55</sup>. This relationship has been interpreted as  
522 evidence that young genes can arise *de novo* from short open reading frames<sup>12,15,56,57</sup> but also as  
523 the result of a bias due to short genes having higher evolutionary rates, which may explain why  
524 their homologues are hard to find<sup>30,58</sup>. Our results enable another view of these correlations of  
525 evolutionary rate, gene age and gene length<sup>7,59,60</sup>. We have shown that an event akin to  
526 incomplete pseudogenization could be taking place, wherein a gene loses functionality through  
527 some disruption, thus triggering rapid divergence due to absence of constraint. After a period of

528 evolutionary “free fall”<sup>59</sup>, this would eventually lead to an entirely novel sequence. If this is  
529 correct, then it could explain why some short genes, presenting as young, evolve faster.

530           Disentangling complete divergence from other processes of orphan and TRG origination  
531 is non-trivial and requires laborious manual inspection<sup>61,62</sup>. Our approach allowed us to explicitly  
532 show that divergence can produce homologous genes that lack detectable similarity and to  
533 estimate the rate at which this takes place. We are able to isolate and examine these genes when  
534 they are found in conserved micro-synteny regions, but at this point we have only a statistical  
535 global view of the process of divergence outside of these regions. Since, for example, in yeast  
536 and in Arabidopsis, ~50% of orphan genes are located outside of syntenic regions of near  
537 relatives<sup>27</sup>, the study of their evolutionary origins represents exciting challenges for future work.  
538 Why do genes in yeast and fly appear to reach the “twilight zone” of sequence similarity  
539 considerably faster than human? One potential explanation is an effect of generation time and/or  
540 population size on evolutionary rates<sup>63,64</sup> and thereby on the process of complete divergence.

541           Overall, our findings are consistent with the view that multiple evolutionary processes are  
542 responsible for the existence of orphan genes and suggest that, contrary to what has been  
543 assumed, divergence is not the predominant one. Investigating the structure, molecular role, and  
544 phenotypes of homologues in the “twilight zone” will be crucial to understand how changes in  
545 sequence and structure produce evolutionary novelty.

546

547

548

549

550

551 **Acknowledgments:** The authors are grateful to Drs. Gilles Fisher, Ingrid Lafontaine, Laurence  
552 Hurst and Aaron Wacholder for reading the manuscript prior to submission.

553 **Funding:** This work was supported by: funding from the European Research Council grant  
554 agreements 309834 and 771419 (awarded to AMcL), funds provided by the Searle Scholars  
555 Program to A-RC and the National Institute of General Medical Sciences of the National Institutes  
556 of Health grants R00GM108865 (awarded to A-RC)

557 **Author contributions:** Conceptualization: NV, A-RC, AMcL; Methodology: NV; A-RC, AMcL;  
558 Investigation: NV; Writing-Original Draft: NV; Writing-Review and Editing: NV; A-RC, AMcL;  
559 Supervision: A-RC, AMcL.

560 **Data and materials availability:** Data is available in the main text and Supplementary  
561 Information. Additional raw data can be found at

562 [https://github.com/Nikos22/Vakirlis\\_Carvunis\\_McLysaght\\_2019](https://github.com/Nikos22/Vakirlis_Carvunis_McLysaght_2019)

563

564 Correspondence and requests for materials should be addressed to [aoife.mclysaght@tcd.ie](mailto:aoife.mclysaght@tcd.ie),  
565 [anc201@pitt.edu](mailto:anc201@pitt.edu)

566

567 **Competing interests:** Authors declare no competing interests.

568

569

570

571

## 572 **Methods**

573

574 All data and scripts necessary to reproduce all figures and analyses are available at  
575 [https://github.com/Nikos22/Vakirlis\\_Carvunis\\_McLysaght\\_2019](https://github.com/Nikos22/Vakirlis_Carvunis_McLysaght_2019). Correspondence of scripts to figures  
576 can be found in each Methods subsection and in the readme file available online on GitHub.

### 577 **Data collection**

578 Reference genome assemblies, annotation files, CDS and protein sequences were downloaded  
579 from NCBI's GenBank for the fly and yeast datasets, and ENSEMBL for the human dataset. Species  
580 names and abbreviations used can be found in Table 1. The latest genome versions available in  
581 January 2018 were used. The yeast annotation used did not include dubious ORFs. OrthoDB v  
582 9.1 flat files were downloaded from <https://www.orthodb.org/?page=filelist>. Divergence times  
583 for focal-target pairs were obtained from <http://timetree.org/><sup>65</sup> (estimated times).  $d_N$  and  $d_S$   
584 values were obtained for *D. melanogaster* and *D. simulans* from <http://www.flydivas.info/><sup>66</sup>  
585 and for human and mouse from ENSEMBL biomart. For *S. cerevisiae*, we calculated  $d_N$  and  $d_S$  over  
586 orthologous alignments of 5 *Saccharomyces* species downloaded from  
587 <http://www.saccharomycessensustricto.org/cgi-bin/s3.cgi><sup>67</sup> using *yn00* from PAML<sup>68</sup> (average of  
588 4 pairwise values for each gene).

### 589 **Synteny-based pipeline for detection of homologous gene pairs**

590 1) Data preparation: Initially, OrthoDB groups were parsed and those that contained  
591 protein-coding genes from the focal species were retained. OrthoDB constructs a



592 hierarchy of orthologous groups at different phylogenetic levels, and so we selected the  
593 highest one to ensure that all relevant species were included. For every protein-coding  
594 gene in the annotation GFF file of the three focal species (yeast, fly, human), we first  
595 matched its name to its OrthoDB identifier. Then, we stored a list of all the target species  
596 genes found in the same OrthoDB group for every focal gene. Finally, the OrthoDB IDs of  
597 the target genes too were matched to the annotation gene names.

598 2) BLAST similarity searches: All similarity searches were performed using the BLAST+<sup>69</sup> suite  
599 of programs. Focal proteomes were used as query to search for similar sequences, using  
600 BLASTp, against their respective target proteomes. The search was performed separately  
601 for every focal-target pair. Default parameters were used and the *E-value* parameter was  
602 set at 1. Target proteomes were reversed using a Python script and the searches were  
603 repeated using the reversed sequences as targets. The results from the reverse searches  
604 were used to define “false homologies”.

605 3) Identification of regions of conserved micro-synteny: For every focal-target genome pair,  
606 we performed the following: for every chromosome/scaffold/contig of the focal genome,  
607 we examine each focal gene in a serial manner (starting from one end of the chromosome  
608 and moving towards the other). For each focal protein-coding gene, if it does not overlap  
609 more than 80% with either its +1 or -1 neighbour, we retrieve the homologues of its +1,+2  
610 and -1,-2 neighbours in the target genome, from the list established previously with  
611 OrthoDB<sup>26</sup>. We then examine every pair-wise combination of the +1,+1 and -1,-2  
612 homologues and identify cases where the homologues are on the same chromosome and  
613 the +1 and -1 homologues are separated by either one or two protein-coding genes. Out

614 of these candidates, we only keep those for which the homologue of the -2 neighbour is  
615 adjacent or separated by one gene from the homologue of the -1 neighbour, and the  
616 homologue of the +2 neighbour is adjacent or separated by one gene from the homologue  
617 of the +1 neighbour. We further filter out all cases for which the homologues of +1 and -  
618 1 belong in the same OrthoDB group, i.e. they appear to be paralogues. The intervening  
619 gene(s) “opposite” the focal gene (between the homologues of its -1 and +1 neighbours)  
620 are stored in a list. The choice to require two syntenic homologues on either side was  
621 made after we conducted an initial trial with a minimum of one homologue on either side,  
622 which showed some limited false positives, revealed by visual inspection (obvious cases  
623 of non-homologous genes which, due to rearrangements such as micro-inversions were  
624 placed “opposite” each other). Increasing the number to two removed all previously  
625 found false positives, again verified by extensive visual inspection and comparison to  
626 other genomic synteny resources (ENSEMBL, SGD). Note that, although, as expected,  
627 stricter synteny criteria led to fewer genes being found in conserved micro-syntenic  
628 blocks, overall results changed minimally between the two versions and hence can be  
629 considered robust.

630 4) Identification of similarity: Once all the focal genes for which a region of conserved micro-  
631 synteny has been identified have been collected for a focal-target genome pair, we test  
632 whether similarity can be detected at a given E-value threshold. First, we look at whether  
633 a precomputed (previously, by us, whole proteome-proteome comparison) BLASTp match  
634 exists between the translated focal gene and the its translated “opposite” genes (taking  
635 into account all translated isoforms), where we predict the match should be found most

636 of the time. If no match exists at the amino acid level there, we perform a TBLASTn search  
637 with default parameters, using the focal gene as query and the genomic region of the  
638 “opposite” gene plus the 2kb flanking regions as target. The search is repeated using the  
639 reversed genomic region as target. If no match is found, we look whether a BLASTP match  
640 exists to any translated gene of the target genome. Finally, for the genes for which no  
641 similarity has been detected, we perform a TBLASTN search against the entire genome of  
642 the target species. This final TBLASTn step is not included in the setting of the optimal E-  
643 value and a fixed E-value threshold of  $10^{-6}$  is used.

644 *Related to Figure 3, Figure 4, Figure 2 – figure supplement 1; relevant scripts: Figure3A.R,*  
645 *Figure3B 4 fig2-suppl.R*

646

647

#### 648 **Calculation of undetectable and false homologies and definition of optimal E-values**

649 For every focal-target pair and for every E-value cut-off, the proportions of focal genes with  
650 at least one identified region of conserved micro-synteny for which a match was found  
651 “opposite” or elsewhere in the genome were calculated. The remaining proportion, i.e. those  
652 with conserved micro-synteny but no match, constitutes the percentage of putative  
653 undetectable homologies. To estimate the “false homologies”, we calculated the proportion  
654 of the focal proteome that had a BLASTp match to the reversed target proteome, or to their  
655 corresponding reversed syntenic genomic region for the ones with identified micro-synteny

656 (see step 4 of previous section). Based on these proportions, we chose the highest value  
657 limiting “false homologies” to 0.05 for our analyses.

658 We also calculated the Mathews Correlation Coefficient (MCC) measure of binary  
659 classification accuracy for every E-value cut-off. This is a balanced measure that takes into  
660 account true and false positives and negatives which can be used even in cases of extensive  
661 class imbalance. At every E-value cut-off, we treated undetectable homologies as False  
662 Negatives, and false homologies (matches to the reversed proteome) as False Positives.  
663 Similarly, sequence-detected homologies (defined based on micro-synteny) were treated as  
664 True Positives and genes for which the reversed-search gave no significant hit were treated  
665 as True Negatives. The MCC measure was then calculated at each E-value cut-off based on  
666 these four values using the *mcc* function of R package mltools. When multiple E-value cut-  
667 offs had the same MCC (rounded at the 3<sup>rd</sup> decimal), the highest (less stringent) E-value was  
668 retained. The results for each focal-target genome pair are shown in Figure 3 – figure  
669 supplement 1 (“general E-value” column).

670 *Related to Figure 3, Figure 4; relevant scripts: Figure3A.R, Figure3B 4 fig2-suppl1.R,*  
671 *Balanced optimal evalule MCC.R*

672

673

674 **Calculation of contribution of divergence beyond recognition to observed numbers of genes**  
675 **without detectable similarity.** For a given pair of focal-target genomes, we estimate the  
676 proportion of all focal genes without detectable similarity that is due to processes other than

677 sequence divergence in a pairwise manner (Figure 6) and in a phylogeny-based manner  
678 (Figure 6 – figure supplement 2). The pairwise approach is calculated as follows (see also  
679 Figure 6 – figure supplement 1 for a schematic explanation): an  $X$  number of the total  $n$  of  
680 focal genes will have no similarity with the target, based on a BLASTP search of the target’s  
681 proteome using the corresponding optimal E-value cut-off and a TBLASTN search of the  
682 target’s genome with an E-value cut-off of  $10^{-6}$ . We have also estimated the proportion  $d$  of  
683 total genes that have lost similarity due to divergence. This was calculated over genes in  
684 conserved micro-synteny but we assume that it can be used as a proxy for the entire genome  
685 since presence in a conserved micro-syntenic region does not significantly impact  
686 evolutionary rates (Figure 5). By calculating the ratio of  $d$  over  $X/n$  we can obtain the  
687 contribution of divergence to the total genes without similarity. The phylogeny-based  
688 approach is performed as follows: for a given “phylostratum” (a given ancestral branch of the  
689 focal species), we estimate the proportion of genes restricted to this phylostratum due to  
690 divergence, again calculated over genes in conserved micro-synteny and extrapolated to all  
691 genes as in the pairwise case. This is done by taking the number of genes restricted to the  
692 phylostratum (TRGs, i.e. those for which the phylogenetically farthest species with a  
693 sequence similarity match falls within the subtree defined by the phylostratum) that have a  
694 putative undetectable homologue (based on micro-synteny) in at least one lineage outside of  
695 that phylostratum, and dividing them by the number of all genes that are predicted to have  
696 a homologue (based on micro-synteny) in at least one lineage outside the phylostratum. In  
697 other words, the proportion out of all genes with at least one micro-synteny conserved  
698 region, and thus a putative homologue, with a species outside the phylostratum, that are

699 restricted, based on sequence similarity, within the specific phylostratum. As in the pairwise  
700 case, this proportion is compared to the proportion calculated based on sequence similarity  
701 alone out of all genes, meaning the proportion of TRGs for a given phylostratum, out of all  
702 genes.

703 The proportion of TRGs that we predict can be explained by divergence at the phylostrata  
704 of *Saccharomyces* (*S. kudriavzevii*, *S. arboricola*), melanogaster subgroup (*D. simulans*, *D.*  
705 *sechellia*, *D. yakuba*, *D. erecta*, *D. ananassae*) and primates (*P. troglodydes*, *G. gorilla*) is  
706 obtained by the phylogeny-based approach described above, at the phylostrata with  
707 branches of origin at 15, 37 and 9 million years ago respectively.

708 *Related to Figure 5, Figure 6, Figure 6 – figure supplement 1 and 2; relevant scripts:*

709 *Figure6 fig6-supp2.R, Figure 5 7 8.R*

710

## 711 **Protein and CDS properties**

712 Pfam matches were predicted using *PfamScan.pl* to search protein sequences against a local  
713 Pfam-A database downloaded from <ftp://ftp.ebi.ac.uk/pub/databases/Pfam><sup>34,70</sup>. Guanine  
714 Cytosine content and CDS length was calculated from the downloaded CDSomes in Python.  
715 Secondary structure (Helix, Strand, Coil), solvent accessibility (buried, exposed) and intrinsic  
716 disorder were predicted using *RaptorX Property*<sup>71</sup>. Transmembrane domains were predicted  
717 with *Phobius*<sup>72</sup>. Low complexity regions in protein sequences were predicted with *segmasker*  
718 from the BLAST+ suite. In the correlation analysis of the various properties, when multiple  
719 isoforms existed for the focal or target gene in a pair, we only kept the pairwise combination

720 (focal-target) with the smallest CDS length difference. For the protein and CDS properties  
721 analyses, we removed all pairs of undetectable homologues from the human dataset for  
722 which our bioinformatic pipeline failed to retrieve the target species homologue CDS  
723 sequence due to non-correspondence between the downloaded annotation and CDS files.  
724 Furthermore, in all undetectable homologues properties analysis, we removed from our  
725 dataset 13 pairs of undetectable homologues whose proteins consisted of low complexity  
726 regions in more than 50% of their length, since we observed that such cases can often  
727 produce false positives (artificial missed homologies) because of BLASTP's low complexity  
728 filter. Pairwise alignments were performed with MAFFT<sup>73</sup>. All statistical analyses were  
729 conducted in R version 3.2.3. All statistical tests performed are two-sided.

730 *Related to Figure 7; relevant scripts: Figure 5 7 8.R*

731

732

733 **Identification of TRGs resulting from lineage-specific divergence within micro-syntenic**  
734 **regions**

735 To identify novel genes likely resulting from lineage-specific divergence and restricted to a  
736 specific taxonomic group, we applied the following criteria. Out of all the candidate genes in  
737 the three focal species with at least two undetectable homologues in two non-monophyletic  
738 (non-sister) target species, we retained those that had no match, according to our pipeline,  
739 to target species that diverged before the most distant of the target species with an  
740 undetectable homologue (see Figure 8A for a schematic representation). For those genes, we

741 also performed an additional BLASTP search against NCBI's NR database with an E-value cut-  
742 off of 0.001 and excluded genes that had matches in outgroup species (i.e. in species outside  
743 of *Saccharomyces*, *Drosophila* and placental mammals for yeast, fly and human respectively).

744 *Related to Figure 8; relevant scripts: Figure 5 7 8.R*

745

746



747 Supplementary Figures

748

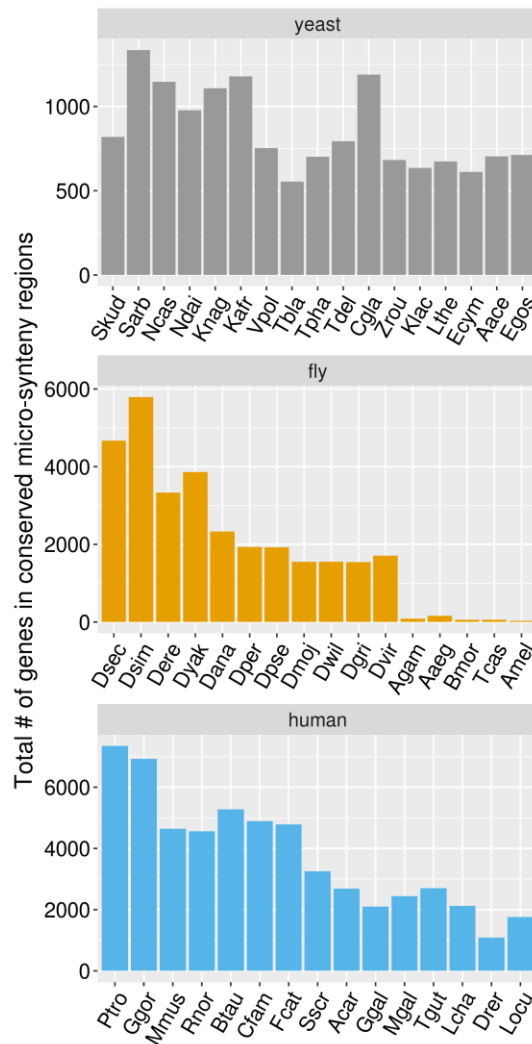

749

750 **Figure 2 – figure supplement 1:** Total number of genes in the focal species genome for which a  
 751 region in conserved micro-synteny was identified in a given target species (x axis). Species are  
 752 ordered in descending divergence times from their corresponding focal species.

753

754

755

756

**A**

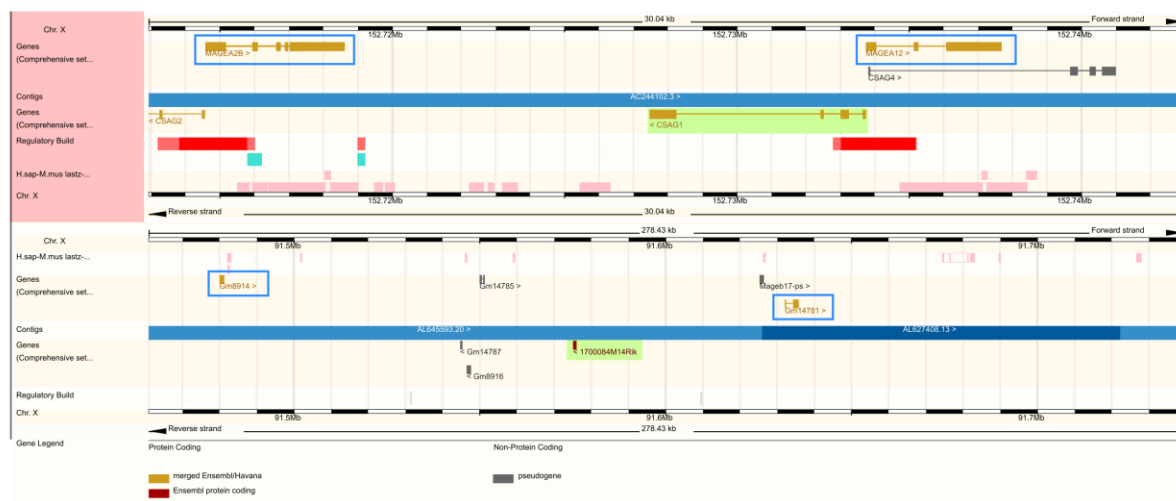

**B**

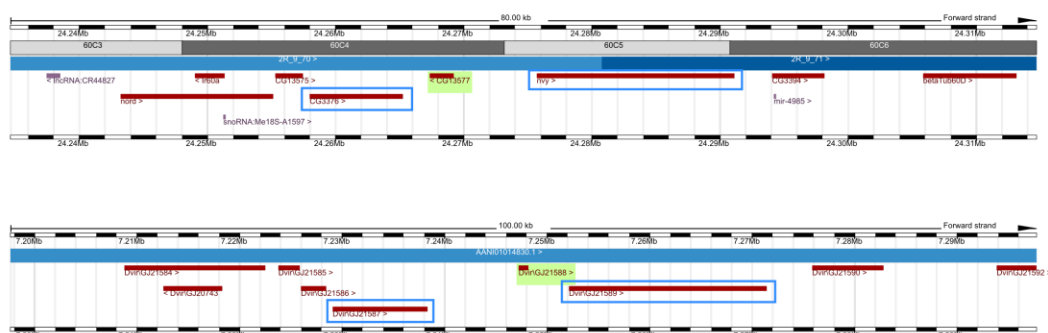

757

758

759 **Figure 4 – figure supplement 1:**

760 A. Genomic region comparison view of ENSEMBL for the case of the human gene *CSAG1*  
 761 (top) and its undetectable homologue in mouse, *1700084M14Rik* (bottom). The two  
 762 genes are highlighted in green, while the adjacent genes based on which the syntenic  
 763 region was defined are highlighted in blue rectangles.

764 B. Same as in A but for the *D. melanogaster* gene *CG13577* (top) and its undetectable  
 765 homologue in *D. virilis* *DvirGJ21588*. Note that this is not a genomic region comparison  
 766 view, but two separate genome browser views from the ENSEMBL metazoan web  
 767 resource.

768

769

770

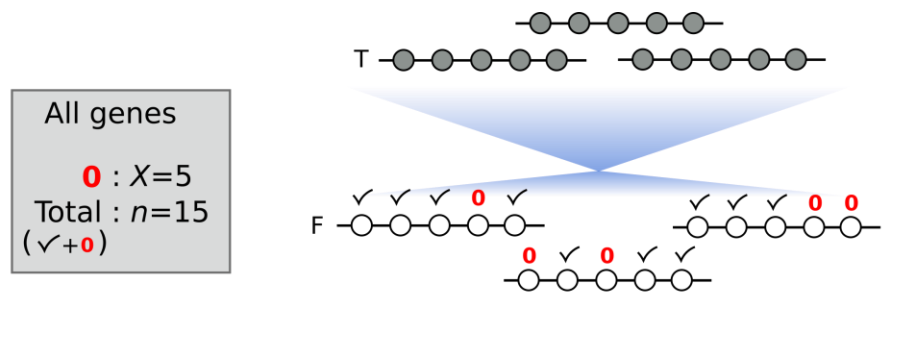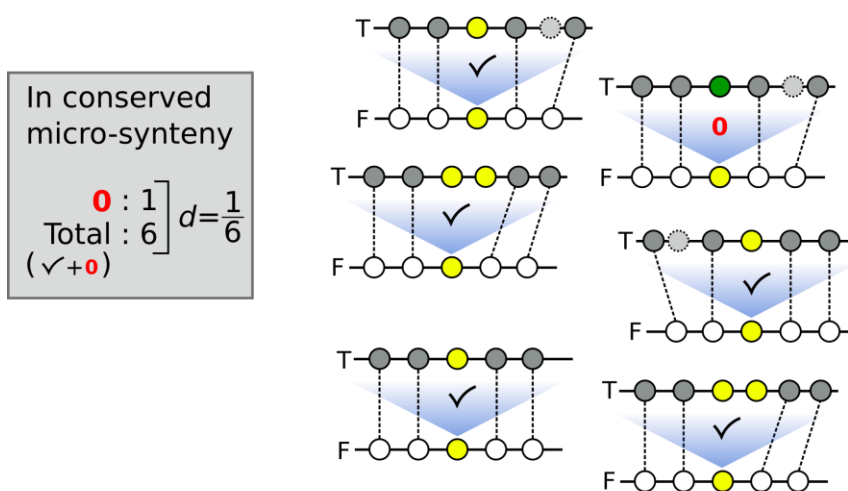

By **extrapolating**  $d$  to the entire genome we calculate the **estimated proportion** of genes without similarity that is **explained by divergence**

$$\frac{d}{(X/n)} = \frac{1/6}{5/15} = 50\%$$

771

772 **Figure 6 – figure supplement 1:** Schematic representation of a toy example as an aid to  
 773 understand how the proportion of genes without similarity that is explained by divergence is  
 774 estimated. Horizontal lines represent segments of chromosomes, and circles represent genes.  
 775 Checkmarks denote identified sequence similarity. Red 0's denote absence of sequence  
 776 similarity.  $n$ : number of total genes;  $X$ : number of genes without sequence similarity; F: focal  
 777 genome; T: target genome. Blue shades represent sequence similarity searches. In the upper part  
 778 of the figure, we represent the similarity search at the entire proteome level between focal and  
 779 target genomes. In the lower part of the figure we indicate the analysis within conserved micro-  
 780 synteny regions, where dashed lines indicate orthologues used to define the micro-synteny

781 conservation. For the gene of interest (yellow circles in the focal genome) sequence similarity in  
 782 the target genome is indicated by shared colour of circles.

783

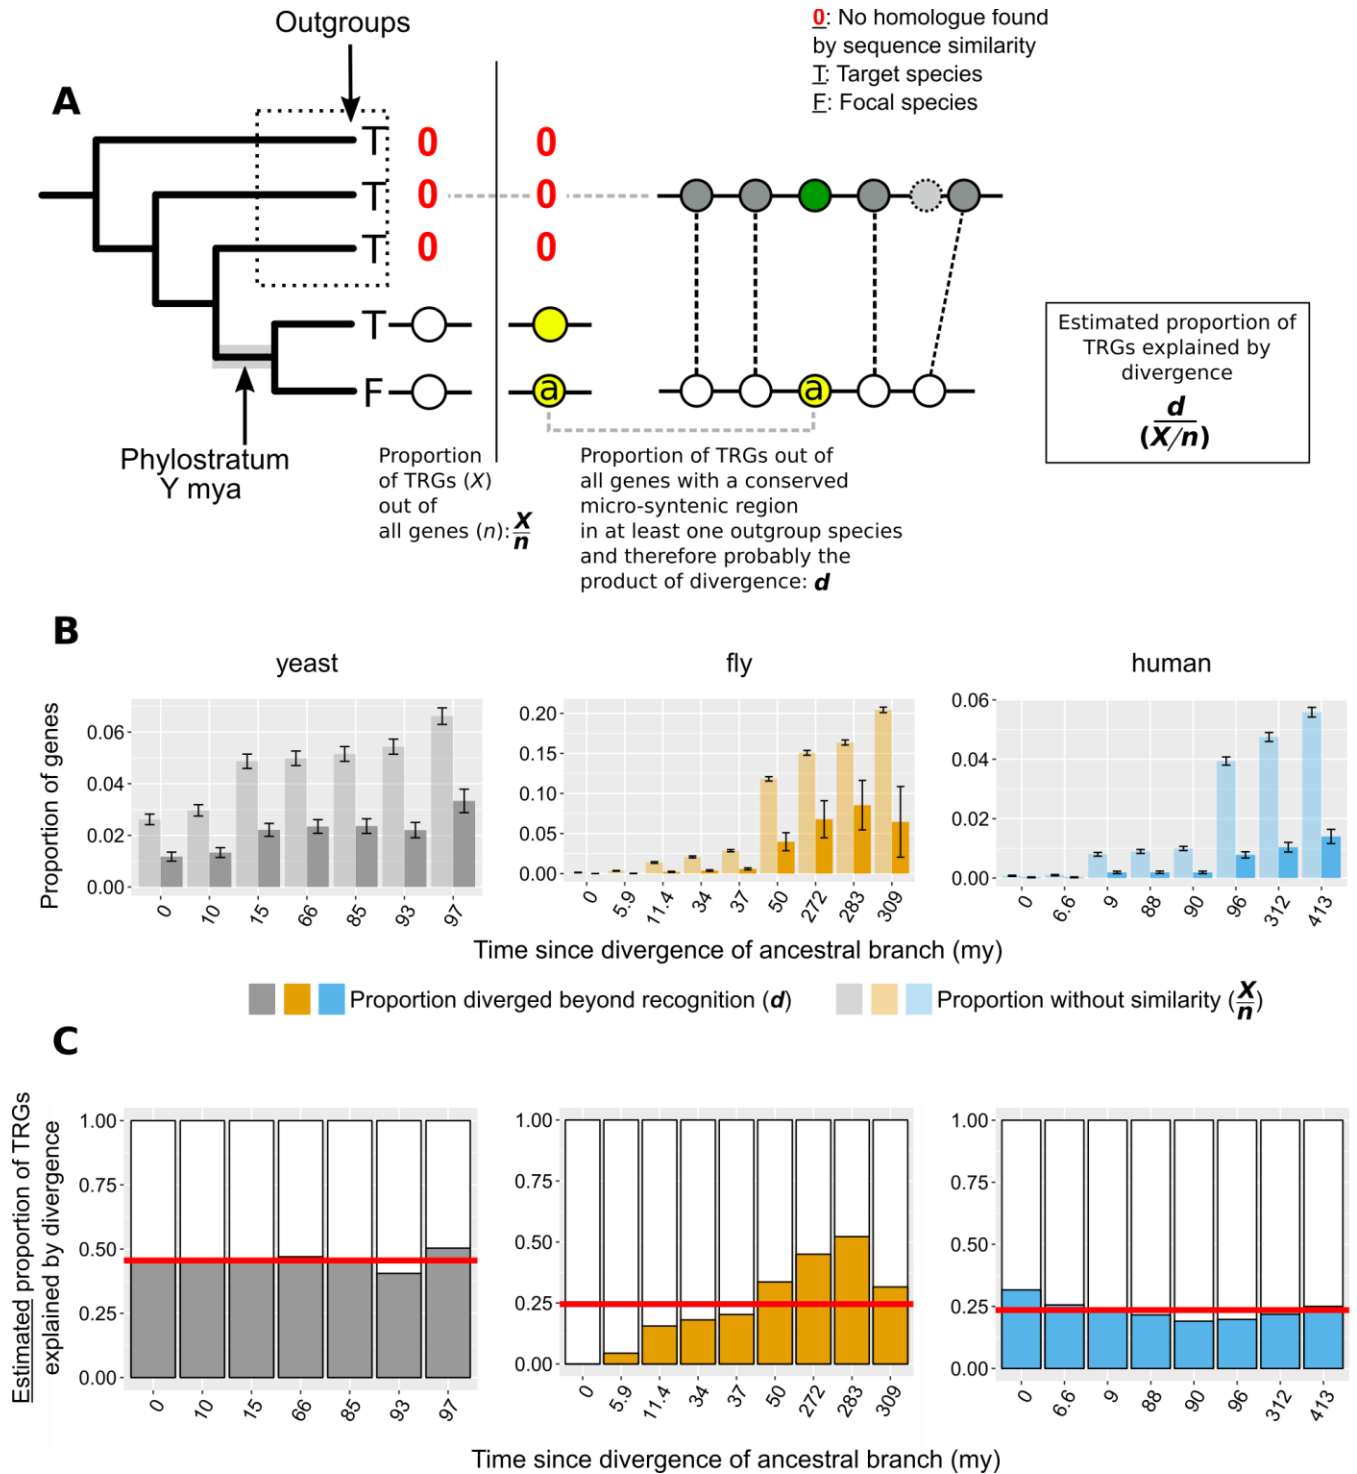

784

785

786

787 **Figure 6 – figure supplement 2:**

- 788 A.  $n$ : number of total genes;  $X$ : number of Taxonomically Restricted Genes (TRGs). Graphical  
789 representation of the of the phylogeny-based approach to estimate the proportion of  
790 genes that lack similarity beyond a specific phylogenetic level because of sequence  
791 divergence. The phylogenetic tree on the left-hand side of the vertical line shows an  
792 example of a TRG: a focal species (F) gene that has a homologue (defined by sequence  
793 similarity) only in its closest neighbour and nowhere else (absence of homologue is shown  
794 with a red 0). This permits the inference of the branch origin of this gene (phylostratum  
795 of the gene) as the branch just prior to the divergence of the lineages that carry the gene  
796 (highlighted in grey). For each phylostratum we can calculate the proportion of genes  
797 originated since ( $X$ ) out of all genes in the genome ( $n$ ). On the right-hand side of the  
798 vertical line we show an example of a gene (a) that is also a TRG as in the left-hand side,  
799 but that also has a region of conserved micro-synteny with a species outside of the  
800 phylostratum, i.e. an outgroup. Thus, we can infer that this TRG can be explained by  
801 sequence divergence, as it appears to have an undetectable homologue in one of the  
802 outgroups. Similarly to the pairwise case then, we can calculate the proportion of TRGs  
803 explained by divergence ( $d$ ) as the number of such cases (TRGs with conserved micro-  
804 synteny with at least one outgroup and hence a putative undetectable homologue in an  
805 outgroup) out of all the genes with conserved micro-synteny with at least one outgroup.
- 806 B. Same as Figure 6A but with phylostrata. For each phylostratum, transparent bars show  
807 the proportion  $X/n$  as defined above in A and solid bars the proportion  $d$ .
- 808 C. Same as Figure 6B but with phylostrata. For each phylostratum, the ratio of the two  
809 proportions shown in top panel ( $d/[X/n]$ ), for which we have assumed that proportion  $d$ ,  
810 calculated over genes showing conserved micro-synteny with an outgroup, can be  
811 approximately extrapolated genome-wide. This ratio gives the estimated proportion of  
812 TRGs explained by divergence. Red horizontal lines show averages.

813

814

815

816

817

818

819

820

821

822

823

824

825 **Supplementary Tables**

826

| d<br>a<br>t<br>a<br>s<br>e<br>t | target<br>species                         | sp<br>.ab<br>br<br>ev<br>. | di<br>v.<br>ti<br>m<br>e | phyl<br>ostr<br>at.<br>E-<br>valu<br>e | gen<br>eral<br>E-<br>valu<br>e | #<br>re<br>si<br>du<br>es | foun<br>d<br>oppo<br>site<br>(and<br>in<br>micro<br>-<br>synte<br>ny) | foun<br>d<br>elsewhere<br>(and in<br>micro-<br>synten<br>y) | not<br>foun<br>d<br>(and in<br>micro-<br>synten<br>y) | total<br>in<br>micr<br>o-<br>synte<br>ny | not<br>foun<br>d<br>and<br>outside<br>micro-<br>synten<br>y | total<br>gene<br>s<br>chec<br>ked |
|---------------------------------|-------------------------------------------|----------------------------|--------------------------|----------------------------------------|--------------------------------|---------------------------|-----------------------------------------------------------------------|-------------------------------------------------------------|-------------------------------------------------------|------------------------------------------|-------------------------------------------------------------|-----------------------------------|
| y<br>e<br>a<br>st               | Saccha<br>romyce<br>s_kudri<br>avzevii    | Sk<br>ud                   | 1<br>0                   | 0.01                                   | 1.0<br>0E-<br>05               | 15<br>41<br>41<br>6       | 801                                                                   | 14                                                          | 4                                                     | 819                                      | 270                                                         | 5997                              |
| y<br>e<br>a<br>st               | Saccha<br>romyce<br>s_arbo<br>ricola      | Sa<br>rb                   | 1<br>5                   | 0.01                                   | 1.0<br>0E-<br>05               | 18<br>21<br>34<br>9       | 1321                                                                  | 13                                                          | 1                                                     | 1335                                     | 237                                                         | 5997                              |
| y<br>e<br>a<br>st               | Naumo<br>vozym<br>a_cast<br>ellii         | Nc<br>as                   | 6<br>6                   | 0.01                                   | 1.0<br>0E-<br>04               | 27<br>68<br>35<br>9       | 1066                                                                  | 68                                                          | 12                                                    | 1146                                     | 477                                                         | 5997                              |
| y<br>e<br>a<br>st               | Naumo<br>vozym<br>a_daie<br>nensis        | N<br>da<br>i               | 6<br>6                   | 0.01                                   | 1.0<br>0E-<br>04               | 28<br>69<br>23<br>0       | 885                                                                   | 77                                                          | 15                                                    | 977                                      | 506                                                         | 5997                              |
| y<br>e<br>a<br>st               | Kazach<br>stania_<br>nagani<br>shii       | Kn<br>ag                   | 8<br>5                   | 0.01                                   | 1.0<br>0E-<br>04               | 26<br>51<br>79<br>0       | 1021                                                                  | 67                                                          | 19                                                    | 1107                                     | 535                                                         | 5997                              |
| y<br>e<br>a<br>st               | Kazach<br>stania_<br>african<br>a         | Ka<br>fr                   | 8<br>5                   | 0.01                                   | 1.0<br>0E-<br>04               | 26<br>12<br>78<br>1       | 1085                                                                  | 74                                                          | 19                                                    | 1178                                     | 534                                                         | 5997                              |
| y<br>e<br>a<br>st               | Vander<br>waltoz<br>yma_p<br>olyspor<br>a | Vp<br>ol                   | 9<br>3                   | 0.01                                   | 1.0<br>0E-<br>04               | 26<br>99<br>85<br>9       | 565                                                                   | 161                                                         | 28                                                    | 754                                      | 604                                                         | 5997                              |

|                   |                                       |              |             |      |                  |                     |      |     |    |      |     |           |
|-------------------|---------------------------------------|--------------|-------------|------|------------------|---------------------|------|-----|----|------|-----|-----------|
| y<br>e<br>a<br>st | Tetrap<br>ispora<br>_blatta<br>e      | Tb<br>la     | 9<br>3      | 0.01 | 1.0<br>0E-<br>06 | 29<br>15<br>17<br>7 | 413  | 116 | 26 | 555  | 639 | 5997      |
| y<br>e<br>a<br>st | Tetrap<br>ispora<br>_phaffi<br>i      | Tp<br>ha     | 9<br>3      | 0.01 | 1.0<br>0E-<br>04 | 26<br>76<br>02<br>8 | 514  | 163 | 24 | 701  | 579 | 5997      |
| y<br>e<br>a<br>st | Torulas<br>pora_d<br>elbruec<br>kii   | Td<br>el     | 9<br>7      | 0.01 | 1.0<br>0E-<br>04 | 24<br>13<br>16<br>4 | 755  | 17  | 21 | 793  | 450 | 5997      |
| y<br>e<br>a<br>st | Candid<br>a_glabr<br>ata              | Cg<br>la     | 9<br>7      | 0.01 | 1.0<br>0E-<br>04 | 26<br>38<br>38<br>4 | 1140 | 33  | 16 | 1189 | 661 | 5997      |
| y<br>e<br>a<br>st | Zygos<br>a_ccharo<br>myces_<br>rouxii | Zr<br>ou     | 9<br>7      | 0.01 | 1.0<br>0E-<br>10 | 24<br>75<br>77<br>9 | 650  | 18  | 15 | 683  | 598 | 5997      |
| y<br>e<br>a<br>st | Kluyver<br>omyces<br>_lactis          | Kl<br>ac     | 1<br>1<br>2 | 0.01 | 1.0<br>0E-<br>04 | 24<br>62<br>50<br>3 | 597  | 12  | 27 | 636  | 581 | 5997      |
| y<br>e<br>a<br>st | Lachan<br>cea_th<br>ermoto<br>lerans  | Lt<br>he     | 1<br>1<br>2 | 0.01 | 1.0<br>0E-<br>07 | 25<br>00<br>34<br>1 | 628  | 21  | 24 | 673  | 568 | 5997      |
| y<br>e<br>a<br>st | Eremot<br>hecium<br>_cymb<br>alariae  | Ec<br>y<br>m | 1<br>1<br>2 | 0.01 | 1.0<br>0E-<br>04 | 21<br>55<br>01<br>8 | 567  | 20  | 24 | 611  | 747 | 5997      |
| y<br>e<br>a<br>st | Ashbya<br>_aceri                      | Aa<br>ce     | 1<br>1<br>2 | 0.01 | 1.0<br>0E-<br>04 | 22<br>41<br>67<br>7 | 637  | 37  | 30 | 704  | 784 | 5997      |
| y<br>e<br>a<br>st | Eremot<br>hecium<br>_gossy<br>pii     | Eg<br>os     | 1<br>1<br>2 | 0.01 | 1.0<br>0E-<br>05 | 23<br>35<br>13<br>6 | 662  | 17  | 33 | 712  | 781 | 5997      |
| fl<br>y           | Drosop<br>hila_se<br>chellia          | Ds<br>ec     | 5.<br>9     | 0.01 | 1.0<br>0E-<br>12 | 71<br>56<br>85<br>6 | 4526 | 140 | 0  | 4666 | 71  | 1392<br>9 |
| fl<br>y           | Drosop<br>hila_si<br>mulans           | Ds<br>im     | 5.<br>9     | 0.01 | 1.0<br>0E-<br>10 | 16<br>46            | 5741 | 53  | 1  | 5795 | 52  | 1392<br>9 |

|         |                                      |              |              |      |                  |                      |      |     |    |      |      |           |
|---------|--------------------------------------|--------------|--------------|------|------------------|----------------------|------|-----|----|------|------|-----------|
|         |                                      |              |              |      |                  | 58<br>02             |      |     |    |      |      |           |
| fl<br>y | Drosop<br>hila_er<br>ecta            | De<br>re     | 1<br>1.<br>4 | 0.01 | 1.0<br>0E-<br>12 | 13<br>13<br>70<br>54 | 3280 | 49  | 1  | 3330 | 131  | 1392<br>9 |
| fl<br>y | Drosop<br>hila_ya<br>kuba            | Dy<br>ak     | 1<br>1.<br>4 | 0.01 | 1.0<br>0E-<br>06 | 15<br>88<br>86<br>88 | 3795 | 65  | 4  | 3864 | 117  | 1392<br>9 |
| fl<br>y | Drosop<br>hila_an<br>anassa<br>e     | Da<br>na     | 3<br>4       | 0.01 | 1.0<br>0E-<br>08 | 14<br>31<br>56<br>68 | 2240 | 87  | 6  | 2333 | 346  | 1392<br>9 |
| fl<br>y | Drosop<br>hila_pe<br>rsimilis        | Dp<br>er     | 3<br>7       | 0.01 | 1.0<br>0E-<br>10 | 72<br>10<br>69<br>5  | 1807 | 110 | 12 | 1929 | 561  | 1392<br>9 |
| fl<br>y | Drosop<br>hila_ps<br>eudoo<br>bscura | Dp<br>se     | 3<br>7       | 0.01 | 1.0<br>0E-<br>07 | 15<br>54<br>61<br>83 | 1820 | 93  | 9  | 1922 | 529  | 1392<br>9 |
| fl<br>y | Drosop<br>hila_m<br>ojaven<br>sis    | D<br>m<br>oj | 5<br>0       | 0.01 | 1.0<br>0E-<br>08 | 12<br>99<br>40<br>75 | 1452 | 82  | 15 | 1549 | 712  | 1392<br>9 |
| fl<br>y | Drosop<br>hila_wi<br>llestoni        | D<br>wi<br>l | 5<br>0       | 0.01 | 1.0<br>0E-<br>08 | 12<br>34<br>53<br>55 | 1075 | 465 | 11 | 1551 | 623  | 1392<br>9 |
| fl<br>y | Drosop<br>hila_gri<br>mshaw<br>i     | Dg<br>ri     | 5<br>0       | 0.01 | 1.0<br>0E-<br>07 | 74<br>21<br>04<br>9  | 1428 | 104 | 12 | 1544 | 832  | 1392<br>9 |
| fl<br>y | Drosop<br>hila_vir<br>ilis           | Dv<br>ir     | 5<br>0       | 0.01 | 1.0<br>0E-<br>07 | 13<br>21<br>84<br>71 | 1580 | 108 | 18 | 1706 | 681  | 1392<br>9 |
| fl<br>y | Anoph<br>eles_ga<br>mbiae            | Ag<br>a<br>m | 2<br>7<br>2  | 0.01 | 1.0<br>0E-<br>12 | 73<br>71<br>68<br>7  | 47   | 35  | 3  | 85   | 2280 | 1392<br>9 |
| fl<br>y | Aedes_<br>aegypti                    | Aa<br>eg     | 2<br>7<br>2  | 0.01 | 1.0<br>0E-<br>12 | 80<br>42<br>16<br>5  | 64   | 84  | 9  | 157  | 2260 | 1392<br>9 |



|                       |                                 |              |             |              |                  |                      |      |     |    |      |      |           |
|-----------------------|---------------------------------|--------------|-------------|--------------|------------------|----------------------|------|-----|----|------|------|-----------|
| fl<br>y               | Bomby<br>x_mori                 | B<br>m<br>or | 2<br>8<br>3 | 0.01         | 1.0<br>0E-<br>18 | 58<br>96<br>63<br>3  | 16   | 32  | 5  | 53   | 2819 | 1392<br>9 |
| fl<br>y               | Triboli<br>um_ca<br>staneu<br>m | Tc<br>as     | 3<br>0<br>9 | 0.01         | 1.0<br>0E-<br>16 | 11<br>41<br>41<br>97 | 20   | 33  | 6  | 59   | 2503 | 1392<br>9 |
| fl<br>y               | Apis_m<br>ellifera              | A<br>m<br>el | 3<br>2<br>5 | 0.01         | 1.0<br>0E-<br>22 | 15<br>28<br>70<br>02 | 11   | 18  | 2  | 31   | 2845 | 1392<br>9 |
| h<br>u<br>m<br>a<br>n | Pan_tr<br>oglydty<br>es         | Pt<br>ro     | 6.<br>6     | 1.00<br>E-04 | 1.0<br>0E-<br>24 | 26<br>54<br>29<br>31 | 7139 | 213 | 1  | 7353 | 47   | 1989<br>2 |
| h<br>u<br>m<br>a<br>n | Gorilla<br>_gorilla             | Gg<br>or     | 9           | 0.00<br>1    | 1.0<br>0E-<br>24 | 23<br>41<br>06<br>91 | 6683 | 236 | 3  | 6922 | 41   | 1989<br>2 |
| h<br>u<br>m<br>a<br>n | Mus_m<br>usculus                | M<br>m<br>us | 8<br>8      | 0.00<br>1    | 1.0<br>0E-<br>09 | 27<br>77<br>66<br>71 | 4462 | 174 | 8  | 4644 | 299  | 1989<br>2 |
| h<br>u<br>m<br>a<br>n | Rattus<br>_norve<br>gicus       | Rn<br>or     | 9<br>0      | 0.00<br>1    | 1.0<br>0E-<br>09 | 15<br>22<br>37<br>77 | 4337 | 220 | 9  | 4566 | 338  | 1989<br>2 |
| h<br>u<br>m<br>a<br>n | Bos_ta<br>urus                  | Bt<br>au     | 9<br>6      | 0.00<br>1    | 1.0<br>0E-<br>09 | 11<br>81<br>07<br>78 | 5054 | 220 | 4  | 5278 | 317  | 1989<br>2 |
| h<br>u<br>m<br>a<br>n | Canis_f<br>amiliari<br>s        | Cf<br>a<br>m | 9<br>6      | 0.00<br>1    | 1.0<br>0E-<br>09 | 14<br>52<br>39<br>14 | 4630 | 248 | 11 | 4889 | 323  | 1989<br>2 |
| h<br>u<br>m<br>a<br>n | Felis_c<br>atus                 | Fc<br>at     | 9<br>6      | 0.00<br>1    | 1.0<br>0E-<br>09 | 17<br>44<br>24<br>42 | 4548 | 228 | 12 | 4788 | 320  | 1989<br>2 |

|                       |                              |              |             |           |                  |                      |      |     |    |      |      |           |
|-----------------------|------------------------------|--------------|-------------|-----------|------------------|----------------------|------|-----|----|------|------|-----------|
| h<br>u<br>m<br>a<br>n | Sus_scr<br>ofa               | Ss<br>cr     | 9<br>6      | 0.00<br>1 | 1.0<br>0E-<br>09 | 27<br>20<br>27<br>27 | 3065 | 180 | 3  | 3248 | 273  | 1989<br>2 |
| h<br>u<br>m<br>a<br>n | Anolis_<br>carolin<br>ensis  | Ac<br>ar     | 3<br>1<br>2 | 0.00<br>1 | 1.0<br>0E-<br>09 | 10<br>14<br>31<br>53 | 2462 | 197 | 26 | 2685 | 1335 | 1989<br>2 |
| h<br>u<br>m<br>a<br>n | Gallus_<br>gallus            | Gg<br>al     | 3<br>1<br>2 | 0.00<br>1 | 1.0<br>0E-<br>09 | 15<br>32<br>31<br>94 | 1963 | 115 | 23 | 2101 | 1346 | 1989<br>2 |
| h<br>u<br>m<br>a<br>n | Meleag<br>ris_gall<br>opavo  | M<br>ga<br>l | 3<br>1<br>2 | 0.00<br>1 | 1.0<br>0E-<br>09 | 87<br>67<br>33<br>0  | 2221 | 180 | 38 | 2439 | 1788 | 1989<br>2 |
| h<br>u<br>m<br>a<br>n | Taenio<br>pygia_<br>guttata  | Tg<br>ut     | 3<br>1<br>2 | 0.00<br>1 | 1.0<br>0E-<br>09 | 81<br>65<br>54<br>4  | 2476 | 202 | 27 | 2705 | 1792 | 1989<br>2 |
| h<br>u<br>m<br>a<br>n | Latime<br>ria_cha<br>lumnae  | Lc<br>ha     | 4<br>1<br>3 | 0.00<br>1 | 1.0<br>0E-<br>09 | 12<br>21<br>67<br>22 | 1853 | 242 | 29 | 2124 | 1303 | 1989<br>2 |
| h<br>u<br>m<br>a<br>n | Danio_<br>rerio              | Dr<br>er     | 4<br>3<br>5 | 0.00<br>1 | 1.0<br>0E-<br>09 | 26<br>80<br>46<br>82 | 823  | 239 | 23 | 1085 | 1341 | 1989<br>2 |
| h<br>u<br>m<br>a<br>n | Lepisos<br>teus_o<br>culatus | Lo<br>cu     | 4<br>3<br>5 | 0.00<br>1 | 1.0<br>0E-<br>09 | 13<br>41<br>30<br>99 | 1558 | 180 | 19 | 1757 | 1383 | 1989<br>2 |

827

828 **Figure 3 – figure supplement 1:** Data from focal-target genome comparisons. “div. time” : time  
 829 since divergence from the focal species. “Phylostrat. E-value”: optimal E-value for use in  
 830 phylostratigraphy. “general E-value”: optimal E-value maximizing Mathews Correlation  
 831 Coefficient. “# residues”: number of residues in the complete proteome of the species. “found

832 opposite”: genes in conserved micro-synteny whose sequence match is found at the predicted  
 833 genomic location. “found elsewhere”: genes in conserved micro-synteny whose match is found  
 834 elsewhere than the predicted location. “not found (and in micro-synteny)”: genes in conserved  
 835 micro-synteny that do not have a match. “total in micro-synteny”: total number of genes in  
 836 conserved micro-synteny. “not found and outside micro-synteny”: number of genes without a  
 837 match that are not found in conserved micro-synteny. “total genes checked”: number of focal  
 838 genes examined.

839

| dataset | focal Pfam | focal total | target Pfam | target total |
|---------|------------|-------------|-------------|--------------|
| yeast   | 47         | 179         | 290         | 433          |
| fly     | 9          | 72          | 21          | 131          |
| human   | 82         | 146         | 211         | 275          |

840

841 **Figure 7 – figure supplement 1: Numbers of focal and target genes with Pfam matches and**  
 842 **total numbers.**

843

| Property    | Rho   | P-value  | Bonferroni-corrected significance (<0.05) |
|-------------|-------|----------|-------------------------------------------|
| Buried pct  | 0.668 | 0.00027  | TRUE                                      |
| CDS length  | 0.705 | 8.00E-05 | TRUE                                      |
| Coil pct    | 0.757 | 1.00E-05 | TRUE                                      |
| Exposed pct | 0.766 | 1.00E-05 | TRUE                                      |
| GC pct      | 0.656 | 0.00037  | TRUE                                      |
| Helix pct   | 0.763 | 1.00E-05 | TRUE                                      |
| ISD pct     | 0.834 | 0        | TRUE                                      |
| LowComp pct | 0.865 | 0        | TRUE                                      |
| Strand pct  | 0.723 | 4.00E-05 | TRUE                                      |
| TM pct      | 0.338 | 0.09798  | FALSE                                     |

844

845 **Figure 7 – figure supplement 2: Correlations of different protein properties between**  
 846 **undetectable homologues. Full property names can be found in the legend of Figure 7.**

847

| Focal gene | No. species with undetectable homologues | dataset | Mean undetectable homologue CDS length | Focal CDS length |
|------------|------------------------------------------|---------|----------------------------------------|------------------|
| CG15282    | 2                                        | fly     | 1089                                   | 240              |
| CG31709    | 2                                        | fly     | 1565                                   | 627              |
| CG42833    | 2                                        | fly     | 1743                                   | 264              |

|             |   |       |          |      |
|-------------|---|-------|----------|------|
| CG43841     | 2 | fly   | 917      | 228  |
| CG44303     | 2 | fly   | 511      | 267  |
| CG45413     | 2 | fly   | 1251     | 447  |
| AC244517.10 | 2 | human | 316.5    | 108  |
| C17orf100   | 2 | human | 1056     | 357  |
| C2orf91     | 2 | human | 236      | 393  |
| C4orf51     | 2 | human | 1167     | 609  |
| C7orf33     | 2 | human | 280.5    | 534  |
| CDRT15      | 2 | human | 450      | 369  |
| CYLC1       | 2 | human | 1117.5   | 207  |
| DEC1        | 2 | human | 487.5    | 213  |
| DIRC1       | 2 | human | 1854     | 315  |
| LMO7DN      | 3 | human | 646      | 369  |
| MT-ATP8     | 3 | human | 167      | 207  |
| MTRNR2L12   | 2 | human | 745.5    | 75   |
| TMCO2       | 2 | human | 340.5    | 549  |
| ABM1        | 2 | yeast | 252      | 372  |
| CSM4        | 3 | yeast | 1237.8   | 471  |
| DGR1        | 2 | yeast | 679      | 147  |
| HBT1        | 2 | yeast | 927      | 3141 |
| RPL41B      | 3 | yeast | 2504.5   | 78   |
| SDD1        | 2 | yeast | 1915.5   | 702  |
| SMA1        | 3 | yeast | 567.75   | 738  |
| SPG3        | 2 | yeast | 641.25   | 384  |
| YBR063C     | 2 | yeast | 526.5    | 1215 |
| YBR144C     | 2 | yeast | 1665.5   | 315  |
| YBR182C-A   | 3 | yeast | 938      | 195  |
| YBR184W     | 3 | yeast | 2859.545 | 1572 |
| YER078W-A   | 2 | yeast | 1824     | 165  |
| YER121W     | 2 | yeast | 677.8    | 345  |
| YGL230C     | 2 | yeast | 483      | 444  |
| YHR007C-A   | 3 | yeast | 1223.4   | 216  |
| YHR050W-A   | 2 | yeast | 598.5    | 171  |
| YHR130C     | 2 | yeast | 955.5    | 336  |
| YIL046W-A   | 3 | yeast | 900.6    | 165  |
| YIL060W     | 2 | yeast | 1818     | 435  |
| YIL086C     | 3 | yeast | 373.5    | 309  |
| YJR151W-A   | 2 | yeast | 2227.5   | 51   |
| YLR255C     | 4 | yeast | 909.75   | 354  |
| YLR406C-A   | 2 | yeast | 832      | 150  |
| YLR415C     | 2 | yeast | 2706     | 339  |
| YML100W-A   | 5 | yeast | 780.818  | 174  |
| YMR001C-A   | 2 | yeast | 2409     | 231  |
| YMR030W-A   | 2 | yeast | 599.25   | 291  |
| YMR141C     | 3 | yeast | 320.25   | 309  |
| YMR242W-A   | 3 | yeast | 1054.667 | 90   |

|           |   |       |       |     |
|-----------|---|-------|-------|-----|
| YMR272W-B | 3 | yeast | 342   | 108 |
| YNL046W   | 2 | yeast | 408   | 519 |
| YNL277W-A | 2 | yeast | 1620  | 189 |
| YOL118C   | 2 | yeast | 561.5 | 309 |
| YOR029W   | 2 | yeast | 874   | 336 |
| YOR032W-A | 2 | yeast | 1179  | 201 |
| YOR316C-A | 2 | yeast | 779   | 210 |
| YPR064W   | 2 | yeast | 970   | 420 |

848

849

850 **Figure 8 – figure supplement 1:** CDS lengths of focal genes and their undetectable homologues,  
851 resulting from lineage-specific divergence.

852

853

854

855

856

857

858

## 859 References

860

861 1. Rubin, G. M. *et al.* Comparative Genomics of the Eukaryotes. *Science* **287**, 2204–2215 (2000).

862 2. Becerra, A., Delaye, L., Islas, S. & Lazcano, A. The Very Early Stages of Biological Evolution and the  
863 Nature of the Last Common Ancestor of the Three Major Cell Domains. *Annu. Rev. Ecol. Evol. Syst.*  
864 **38**, 361–379 (2007).

865 3. Goldman, A. D., Bernhard, T. M., Dolzhenko, E. & Landweber, L. F. LUCApedia: a database for the  
866 study of ancient life. *Nucleic Acids Res.* **41**, D1079–D1082 (2013).

867 4. Gabaldón, T. & Koonin, E. V. Functional and evolutionary implications of gene orthology. *Nat. Rev.*  
868 *Genet.* **14**, 360 (2013).

- 869 5. Koonin, E. V. Orthologs, Paralogs, and Evolutionary Genomics. *Annu. Rev. Genet.* **39**, 309–338  
870 (2005).
- 871 6. Wilson, G. A. *et al.* Orphans as taxonomically restricted and ecologically important genes.  
872 *Microbiology*, **151**, 2499–2501 (2005).
- 873 7. Tautz, D. & Domazet-Lošo, T. The evolutionary origin of orphan genes. *Nat. Rev. Genet.* **12**, 692–702  
874 (2011).
- 875 8. Doolittle, R. F. Similar amino acid sequences: chance or common ancestry? *Science* **214**, 149–159  
876 (1981).
- 877 9. Wolfe, K. Evolutionary Genomics: Yeasts Accelerate beyond BLAST. *Curr. Biol.* **14**, R392–R394 (2004).
- 878 10. Hotopp, J. C. D. Horizontal gene transfer between bacteria and animals. *Trends Genet.* **27**, 157–163  
879 (2011).
- 880 11. Vakirlis, N. *et al.* A Molecular Portrait of De Novo Genes in Yeasts. *Mol. Biol. Evol.* **35**, 631–645  
881 (2018).
- 882 12. McLysaght, A. & Guerzoni, D. New genes from non-coding sequence: the role of de novo protein-  
883 coding genes in eukaryotic evolutionary innovation. *Phil Trans R Soc B* **370**, 20140332 (2015).
- 884 13. Oss, S. B. V. & Carvunis, A.-R. De novo gene birth. *PLOS Genet.* **15**, e1008160 (2019).
- 885 14. Long, M., Betrán, E., Thornton, K. & Wang, W. The origin of new genes: glimpses from the young  
886 and old. *Nat. Rev. Genet.* **4**, 865–875 (2003).
- 887 15. Carvunis, A.-R. *et al.* Proto-genes and de novo gene birth. *Nature* **487**, 370–374 (2012).
- 888 16. Long, M., VanKuren, N. W., Chen, S. & Vibranovski, M. D. New Gene Evolution: Little Did We Know.  
889 *Annu. Rev. Genet.* **47**, 307–333 (2013).
- 890 17. Tautz, D. The discovery of de novo gene evolution. *Perspect. Biol. Med.* **57**, 149–161 (2014).
- 891 18. Schlötterer, C. Genes from scratch – the evolutionary fate of de novo genes. *Trends Genet.* **31**, 215–  
892 219 (2015).

- 893 19. Baalsrud, H. T. *et al.* De novo gene evolution of antifreeze glycoproteins in codfishes revealed by  
894 whole genome sequence data. *Mol. Biol. Evol.* doi:10.1093/molbev/msx311.
- 895 20. Zhuang, X., Yang, C., Murphy, K. R. & Cheng, C.-H. C. Molecular mechanism and history of non-sense  
896 to sense evolution of antifreeze glycoprotein gene in northern gadids. *Proc. Natl. Acad. Sci.*  
897 201817138 (2019) doi:10.1073/pnas.1817138116.
- 898 21. Dujon, B. The yeast genome project: what did we learn? *Trends Genet.* **12**, 263–270 (1996).
- 899 22. Wolfe, K. H. & Shields, D. C. Molecular evidence for an ancient duplication of the entire yeast  
900 genome. *Nature* **387**, 708–713 (1997).
- 901 23. Kellis, M., Birren, B. W. & Lander, E. S. Proof and evolutionary analysis of ancient genome  
902 duplication in the yeast *Saccharomyces cerevisiae*. *Nature* **428**, 617–624 (2004).
- 903 24. Dietrich, F. S. *et al.* The *Ashbya gossypii* Genome as a Tool for Mapping the Ancient *Saccharomyces*  
904 *cerevisiae* Genome. *Science* **304**, 304–307 (2004).
- 905 25. Herrera-Úbeda, C. *et al.* Microsyntenic Clusters Reveal Conservation of lncRNAs in Chordates  
906 Despite Absence of Sequence Conservation. *Biology* **8**, 61 (2019).
- 907 26. Kriventseva, E. V., Rahman, N., Espinosa, O. & Zdobnov, E. M. OrthoDB: the hierarchical catalog of  
908 eukaryotic orthologs. *Nucleic Acids Res.* **36**, D271–D275 (2008).
- 909 27. Arendsee, Z. *et al.* fagin: synteny-based phylostratigraphy and finer classification of young genes.  
910 *BMC Bioinformatics* **20**, 440 (2019).
- 911 28. Frith, M. C. A new repeat-masking method enables specific detection of homologous sequences.  
912 *Nucleic Acids Res.* **39**, e23–e23 (2011).
- 913 29. Domazet-Lošo, T., Brajković, J. & Tautz, D. A phylostratigraphy approach to uncover the genomic  
914 history of major adaptations in metazoan lineages. *Trends Genet.* **23**, 533–539 (2007).
- 915 30. Moyers, B. A. & Zhang, J. Phylostratigraphic bias creates spurious patterns of genome evolution.  
916 *Mol. Biol. Evol.* msu286 (2014) doi:10.1093/molbev/msu286.

- 917 31. Domazet-Lošo, T. *et al.* No evidence for phylostratigraphic bias impacting inferences on patterns of  
918 gene emergence and evolution. *Mol. Biol. Evol.* msw284 (2017) doi:10.1093/molbev/msw284.
- 919 32. Domazet-Loso, T. & Tautz, D. An Evolutionary Analysis of Orphan Genes in *Drosophila*. *Genome Res.*  
920 **13**, 2213–2219 (2003).
- 921 33. Rosenthal, R., Cooper, H. & Hedges, L. Parametric measures of effect size. *Handb. Res. Synth.* **621**,  
922 231–244 (1994).
- 923 34. Finn, R. D. *et al.* The Pfam protein families database: towards a more sustainable future. *Nucleic*  
924 *Acids Res.* **44**, D279–D285 (2016).
- 925 35. Watts, T. *et al.* Mne1 Is a Novel Component of the Mitochondrial Splicing Apparatus Responsible for  
926 Processing of a COX1 Group I Intron in Yeast. *J. Biol. Chem.* **286**, 10137–10146 (2011).
- 927 36. Byrne, K. P. & Wolfe, K. H. The Yeast Gene Order Browser: Combining curated homology and  
928 syntenic context reveals gene fate in polyploid species. *Genome Res.* **15**, 1456–1461 (2005).
- 929 37. Wilson, B. A., Foy, S. G., Neme, R. & Masel, J. Young genes are highly disordered as predicted by the  
930 preadaptation hypothesis of de novo gene birth. *Nat. Ecol. Evol.* **1**, 0146 (2017).
- 931 38. Ruiz-Orera, J. *et al.* Origins of De Novo Genes in Human and Chimpanzee. *PLoS Genet* **11**, e1005721  
932 (2015).
- 933 39. Cherry, J. M. *et al.* *Saccharomyces* Genome Database: the genomics resource of budding yeast.  
934 *Nucleic Acids Res.* **40**, D700–D705 (2012).
- 935 40. Ware, S. M. *et al.* Infantile cardiomyopathy caused by a mutation in the overlapping region of  
936 mitochondrial ATPase 6 and 8 genes. *J. Med. Genet.* **46**, 308–314 (2009).
- 937 41. van der Westhuizen, F. H. *et al.* Aberrant synthesis of ATP synthase resulting from a novel deletion  
938 in mitochondrial DNA in an African patient with progressive external ophthalmoplegia. *J. Inherit.*  
939 *Metab. Dis.* **33 Suppl 3**, S55-62 (2010).



- 940 42. Nishiwaki, T., Daigo, Y., Kawasoe, T. & Nakamura, Y. Isolation and mutational analysis of a novel  
941 human cDNA, DEC1 (deleted in esophageal cancer 1), derived from the tumor suppressor locus in  
942 9q32. *Genes. Chromosomes Cancer* **27**, 169–176 (2000).
- 943 43. Druck, T. *et al.* The *DIRC1* gene at chromosome 2q33 spans a familial RCC-associated t(2;3)(q33;q21)  
944 chromosome translocation. *J. Hum. Genet.* **46**, 583–589 (2001).
- 945 44. McLysaght, A. & Hurst, L. D. Open questions in the study of de novo genes: what, how and why. *Nat.*  
946 *Rev. Genet.* **17**, 567–578 (2016).
- 947 45. Li, Q.-R. *et al.* Revisiting the *Saccharomyces cerevisiae* predicted ORFeome. *Genome Res.* **18**, 1294–  
948 1303 (2008).
- 949 46. Cai, J., Zhao, R., Jiang, H. & Wang, W. De Novo Origination of a New Protein-Coding Gene in  
950 *Saccharomyces cerevisiae*. *Genetics* **179**, 487–496 (2008).
- 951 47. Albà, M. M. & Castresana, J. On homology searches by protein Blast and the characterization of the  
952 age of genes. *BMC Evol. Biol.* **7**, 53 (2007).
- 953 48. Moyers, B. A. & Zhang, J. Evaluating Phylostratigraphic Evidence for Widespread De Novo Gene Birth  
954 in Genome Evolution. *Mol. Biol. Evol.* **33**, 1245–1256 (2016).
- 955 49. Jain, A., Perisa, D., Fliedner, F., von Haeseler, A. & Ebersberger, I. The evolutionary traceability of a  
956 protein. *Genome Biol. Evol.* doi:10.1093/gbe/evz008.
- 957 50. Wissler, L., Gadau, J., Simola, D. F., Helmkampf, M. & Bornberg-Bauer, E. Mechanisms and Dynamics  
958 of Orphan Gene Emergence in Insect Genomes. *Genome Biol. Evol.* **5**, 439–455 (2013).
- 959 51. Toll-Riera, M. *et al.* Origin of Primate Orphan Genes: A Comparative Genomics Approach. *Mol. Biol.*  
960 *Evol.* **26**, 603–612 (2009).
- 961 52. Ekman, D. & Elofsson, A. Identifying and quantifying orphan protein sequences in fungi. *J. Mol. Biol.*  
962 **396**, 396–405 (2010).

- 963 53. Palmieri, N., Kosiol, C. & Schlötterer, C. The life cycle of Drosophila orphan genes. *eLife* **3**, e01311  
964 (2014).
- 965 54. Vakirlis, N. *et al.* Reconstruction of ancestral chromosome architecture and gene repertoire reveals  
966 principles of genome evolution in a model yeast genus. *Genome Res.* (2016)  
967 doi:10.1101/gr.204420.116.
- 968 55. Khalturin, K., Hemmrich, G., Fraune, S., Augustin, R. & Bosch, T. C. G. More than just orphans: are  
969 taxonomically-restricted genes important in evolution? *Trends Genet.* **25**, 404–413 (2009).
- 970 56. Zhao, L., Saelao, P., Jones, C. D. & Begun, D. J. Origin and Spread of de Novo Genes in Drosophila  
971 melanogaster Populations. *Science* **343**, 769–772 (2014).
- 972 57. Siepel, A. Darwinian alchemy: Human genes from noncoding DNA. *Genome Res.* **19**, 1693–1695  
973 (2009).
- 974 58. Moyers, B. A. & Zhang, J. Further simulations and analyses demonstrate open problems of  
975 phylostratigraphy. *Genome Biol. Evol.* doi:10.1093/gbe/evx109.
- 976 59. Wolf, Y. I., Novichkov, P. S., Karev, G. P., Koonin, E. V. & Lipman, D. J. The universal distribution of  
977 evolutionary rates of genes and distinct characteristics of eukaryotic genes of different apparent  
978 ages. *Proc. Natl. Acad. Sci.* **106**, 7273–7280 (2009).
- 979 60. Albà, M. M. & Castresana, J. Inverse Relationship Between Evolutionary Rate and Age of Mammalian  
980 Genes. *Mol. Biol. Evol.* **22**, 598–606 (2005).
- 981 61. Prabh, N. & Rödelberger, C. De Novo, Divergence, and Mixed Origin Contribute to the Emergence  
982 of Orphan Genes in Pristionchus Nematodes. *G3 Genes Genomes Genet.* **9**, 2277–2286 (2019).
- 983 62. Zhou, Q. *et al.* On the origin of new genes in Drosophila. *Genome Res.* **18**, 1446–1455 (2008).
- 984 63. Martin, A. P. & Palumbi, S. R. Body size, metabolic rate, generation time, and the molecular clock.  
985 *Proc. Natl. Acad. Sci.* **90**, 4087–4091 (1993).
- 986 64. Bromham, L. & Penny, D. The modern molecular clock. *Nat. Rev. Genet.* **4**, 216–224 (2003).

- 987 65. Hedges, S. B., Dudley, J. & Kumar, S. TimeTree: a public knowledge-base of divergence times among  
988 organisms. *Bioinformatics* **22**, 2971–2972 (2006).
- 989 66. Stanley, C. E. & Kulathinal, R. J. flyDIVaS: A Comparative Genomics Resource for *Drosophila*  
990 Divergence and Selection. *G3 Genes Genomes Genet.* **6**, 2355–2363 (2016).
- 991 67. Scannell, D. R. *et al.* The Awesome Power of Yeast Evolutionary Genetics: New Genome Sequences  
992 and Strain Resources for the *Saccharomyces sensu stricto* Genus. *G3 Genes Genomes Genet.* **1**, 11–  
993 25 (2011).
- 994 68. Yang, Z. PAML 4: Phylogenetic Analysis by Maximum Likelihood. *Mol. Biol. Evol.* **24**, 1586–1591  
995 (2007).
- 996 69. Altschul, S. F. *et al.* Gapped BLAST and PSI-BLAST: a new generation of protein database search  
997 programs. *Nucleic Acids Res.* **25**, 3389–3402 (1997).
- 998 70. Eddy, S. R. Accelerated Profile HMM Searches. *PLoS Comput Biol* **7**, e1002195 (2011).
- 999 71. Wang, S., Li, W., Liu, S. & Xu, J. RaptorX-Property: a web server for protein structure property  
1000 prediction. *Nucleic Acids Res.* **44**, W430–W435 (2016).
- 1001 72. Käll, L., Krogh, A. & Sonnhammer, E. L. L. Advantages of combined transmembrane topology and  
1002 signal peptide prediction—the Phobius web server. *Nucleic Acids Res.* **35**, W429–W432 (2007).
- 1003 73. Katoh, K. & Standley, D. M. MAFFT Multiple Sequence Alignment Software Version 7: Improvements  
1004 in Performance and Usability. *Mol. Biol. Evol.* **30**, 772–780 (2013).
- 1005
